# Supplementary material
Source: publisher figshare collection journal article supplement (https://tandf.figshare.com/articles/dataset/_/28473765)
Supplement: Supplementary file 1 [file 1]

Our data includes three CSV datasets. The file "X at 20220104 and Y at 20220401.csv" contains the returns of 800 stocks for the first quarter of 2022 and the standardized covariates values from the fourth quarter of 2021. The file "X at 20220401 and Y at 20220701.csv" includes the returns of 800 stocks for the second quarter of 2022 and the standardized covariates values from the first quarter of 2022. The file "network.csv" represents the network connections between the 800 stocks.

In files "X at 20220104 and Y at 20220401.csv" and "X at 20220401 and Y at 20220701.csv",“stock ID” represents the IDs of the 800 stocks, “Y” represents the stock returens. Moreover, “book to market ratio earnings”, “per share/stock price”, “firm equity/interest-bearing debt”, “ fixed assets ratio”, “total operating revenue”, “net debt”, “interest-free liabilities”, “ operating cash flow/net debt”, “ price-to-book ratio”, and “ working capital”, correspond to ten finacial ratios in the paper.
