# Supplementary material
Source: publisher figshare collection journal article supplement (https://tandf.figshare.com/articles/dataset/_/28473765)
Supplement: Supplementary file 2 [file 1]

# Supplementary Material for Network Varying Coefficient Model

The supplementary material consists of nine sections. Section S.1 introduces six lemmas. Sections S.2–S.4 demonstrate Theorems 1–3, respectively. Section S.5 presents additional discussion on Condition (C3) and discusses a related issue on collinearity. Section S.6 investigates the extension of the proposed model to accommodate the heterophilic network. Section S.7 introduces two competing methods used in our simulations. Sections S.8 and S.9 present additional data description and results in simulation studies and real data analysis, respectively.

## S.1 Useful Lemmas

To prove the theorems in Sections 2 and 3, we introduce the following six useful lemmas. Lemma 1 is borrowed from Theorem 1.1 of Rudelson and Vershynin (2013), and Lemmas 2 and 3 are borrowed from Lemmas 31 and 28 of Ma et al. (2020), respectively. Then, we present the proofs of Lemmas 4 and 5. Since Lemma 6 can be demonstrated by employing similar techniques to those used in proving Lemma 5, its proof is omitted.

**Lemma 1.** *Let  $\tilde{\varepsilon} = (\tilde{\varepsilon}_1, \dots, \tilde{\varepsilon}_n)^\top \in \mathbb{R}^n$ , where the  $\tilde{\varepsilon}_i$ s for  $i = 1, \dots, n$  are independent and satisfy  $E(\tilde{\varepsilon}_i) = 0$ , and  $\sup_h h^{-1/2} \{E(|\tilde{\varepsilon}_i|^h)\}^{1/h} < \varphi$  for a finite positive constant  $\varphi$ . Let  $U$  be an arbitrary  $n \times n$  matrix. Then, for any  $t > 0$ ,  $Pr(|\tilde{\varepsilon}^\top U \tilde{\varepsilon} - E(\tilde{\varepsilon}^\top U \tilde{\varepsilon})| > t) \leq 2 \exp\{-c_1 \min\{t^2 \varphi^{-4} \|U\|_F^{-2}, t \varphi^{-2} \|U\|_2^{-1}\}\}$ , where  $c_1$  is a finite positive constant.*

**Lemma 2.** *Let  $A = (a_{ij}) \in \mathbb{R}^{n \times n}$  be the symmetric adjacency matrix of a random graph on  $n$  nodes, where  $a_{ij}$ , for any  $i < j$ , is independent and  $a_{ii} = 0$ . Let  $E(a_{ij}) = P_{ij}$  for all  $i \neq j$ , and  $P_{ii} \in [0, 1]$ . Then, for any  $r > 0$ , there exists a constant  $C_A = C_A(r)$  such that  $\|A - P\|_2 \leq C_A \sqrt{n}$  with a probability of at least  $1 - n^{-r}$ .*

**Lemma 3.** *For any arbitrary matrices  $Z_1$  and  $Z_2 \in \mathbb{R}^{n \times k}$ , we obtain  $\min_{O: O^\top O = O O^\top = I_k} \|Z_1 - Z_2 O\|_F^2 \leq \frac{1}{2(\sqrt{2}-1)\lambda_k(Z_2^\top Z_2)} \|Z_1 Z_1^\top - Z_2 Z_2^\top\|_F^2$ .*

**Lemma 4.** *Under Conditions (C1)–(C5), we have*

$$\min_{O: O^\top O = O O^\top = I_k} \|\hat{Z} - Z_0 O\|_F^2 \leq \tilde{c} := \frac{2c''^2}{(\sqrt{2}-1)c^{*2}\tau_3},$$

*with a probability of  $1 - 2 \exp(-c_1 n) - n^{-r}$ , where  $c^* = \min\{1/\delta, 2^{-1} \exp(M_2) / (1 + \exp(M_2))\}^2$  and  $c'' = \max\{\sqrt{(2k+4)C_A}, 2\delta^{-1} \sqrt{(\varphi^2 + 1)\sigma^2}\}$ . Here,  $\delta$  is a scale parameter defined in equation (5),  $M_2$  is defined in Condition (C2),  $\sigma^2$  is the variance of the random error, and  $c_1$ ,  $C_A$  and  $r$  were defined in Lemmas 1 and 2.*

**Proof:** We prove this lemma in two steps. Step I obtains an upper bound of the estimation error of  $\Theta_0$ , and Step II shows the upper bound of  $\min_{O: O^\top O = O O^\top = I_k} \|\hat{Z} - Z_0 O\|_F^2$ .

**Step I:** Since  $(\hat{Z}, \hat{\alpha}, \hat{B}, \hat{\gamma}) = \operatorname{argmin}_{Z, \alpha, B, \gamma} L(Z, \alpha, B, \gamma)$ , we have that  $L(\hat{Z}, \hat{\alpha}, \hat{B}, \hat{\gamma}) - L(Z_0, \alpha_0, B_0, \gamma_0) \leq 0$ . Then, employing Taylor's expansion, we obtain

$$\begin{aligned} L(\hat{Z}, \hat{\alpha}, \hat{B}, \hat{\gamma}) - L(Z_0, \alpha_0, B_0, \gamma_0) &= \sum_{i=1}^n \left( y_i - x_i^\top \hat{\beta}_i \right)^2 / \delta - \sum_{i=1}^n \left( y_i - x_i^\top \beta_{0,i} \right)^2 / \delta \\ &\quad - \sum_{i,j}^n \left\{ A_{ij} \hat{\Theta}_{ij} - \log \left( 1 + \exp \left( \hat{\Theta}_{ij} \right) \right) \right\} + \sum_{i,j}^n \left\{ A_{ij} \Theta_{0,ij} - \log \left( 1 + \exp \left( \Theta_{0,ij} \right) \right) \right\} \\ &= \frac{1}{\delta} \sum_{i=1}^n \left\{ \left( \hat{\beta}_i - \beta_{0,i} \right)^\top x_i x_i^\top \left( \hat{\beta}_i - \beta_{0,i} \right) - 2 \left( y_i - x_i^\top \beta_{0,i} \right) x_i^\top \left( \hat{\beta}_i - \beta_{0,i} \right) \right\} \\ &\quad - \sum_{i,j}^n \left\{ \left( A_{ij} - P_{0,ij} \right) \left( \hat{\Theta}_{ij} - \Theta_{0,ij} \right) - \frac{1}{2} \check{P}_{ij} \left( 1 - \check{P}_{ij} \right) \left( \hat{\Theta}_{ij} - \Theta_{0,ij} \right)^2 \right\} \leq 0, \end{aligned}$$

where  $\check{P}_{ij} = 1 / \{1 + \exp(-\check{\Theta}_{ij})\}$ , and  $\check{\Theta}_{ij}$  lies between  $\hat{\Theta}_{ij}$  and  $\Theta_{0,ij}$ . Accordingly, we obtain

$$\begin{aligned} &\frac{1}{\delta} \sum_{i=1}^n \left( \hat{\beta}_i - \beta_{0,i} \right)^\top x_i x_i^\top \left( \hat{\beta}_i - \beta_{0,i} \right) + \sum_{i,j}^n \frac{1}{2} \check{P}_{ij} (1 - \check{P}_{ij}) (\hat{\Theta}_{ij} - \Theta_{0,ij})^2 \\ &\leq \sum_{i,j}^n (A_{ij} - P_{0,ij}) (\hat{\Theta}_{ij} - \Theta_{0,ij}) + 2\delta^{-1} \sum_{i=1}^n \left( y_i - x_i^\top \beta_{0,i} \right) x_i^\top \left( \hat{\beta}_i - \beta_{0,i} \right). \end{aligned}$$

By Condition (C2), we have  $1 / \{1 + \exp(M_2)\} \leq \check{P}_{ij} \leq \exp(M_2) / \{1 + \exp(M_2)\}$ . In addition, denote  $c^* = \min \{1/\delta, 2^{-1} \exp(M_2) / (1 + \exp(M_2))^2\}$ . We then have

$$\begin{aligned} &c^* \left\{ \|\hat{\Theta} - \Theta_0\|_F^2 + \sum_{i=1}^n \left( \hat{\beta}_i - \beta_{0,i} \right)^\top x_i x_i^\top \left( \hat{\beta}_i - \beta_{0,i} \right) \right\} \\ &\leq \operatorname{tr} \left\{ (A - P_0)^\top (\hat{\Theta} - \Theta_0) \right\} + 2\delta^{-1} \sum_{i=1}^n \left( y_i - x_i^\top \beta_{0,i} \right) x_i^\top \left( \hat{\beta}_i - \beta_{0,i} \right) \\ &\leq \operatorname{tr} \left\{ (A - P_0)^\top (\hat{\Theta} - \Theta_0) \right\} + 2\delta^{-1} \left( \sum_{i=1}^n \epsilon_i^2 \right)^{1/2} \left\{ \sum_{i=1}^n \left( \hat{\beta}_i - \beta_{0,i} \right)^\top x_i x_i^\top \left( \hat{\beta}_i - \beta_{0,i} \right) \right\}^{1/2} \\ &\doteq \mathcal{I}_1 + \mathcal{I}_2, \end{aligned}$$

where  $\epsilon_i = y_i - x_i^\top \beta_{0,i}$  for  $i = 1, \dots, n$ . The above result can be used to obtain the bound of the estimation error of  $\Theta_0$ . We next consider  $\mathcal{I}_1$  and  $\mathcal{I}_2$  separately.

After algebraic calculations, the first term  $\mathcal{I}_1$  satisfies  $\operatorname{tr} \left\{ (A - P_0)^\top (\hat{\Theta} - \Theta_0) \right\} \leq \|A - P_0\|_2 \operatorname{rank}^{1/2}(\hat{\Theta} - \Theta_0) \|\hat{\Theta} - \Theta_0\|_F \leq \sqrt{2k+4} \|A - P_0\|_2 \|\hat{\Theta} - \Theta_0\|_F$ . By Lemma 2, with a probability of  $1 - n^{-r}$ , we have  $\|A - P_0\|_2 \leq C_A \sqrt{n}$ . This, together with the above result, implies that  $\mathcal{I}_1 \leq \sqrt{(2k+4)n} C_A \|\hat{\Theta} - \Theta_0\|_F$ , with a probability of  $1 - n^{-r}$ .

We next consider the second part  $\mathcal{I}_2$ . According to Lemma 1, with a probability of  $1 - 2 \exp(-c_1 n)$ , we have  $\sqrt{\sum_{i=1}^n \epsilon_i^2} \leq \sqrt{(\varphi^2 + 1)n\sigma^2}$ . Denote  $\mathcal{O} = \sqrt{\sum_{i=1}^n \left( \hat{\beta}_i - \beta_{0,i} \right)^\top x_i x_i^\top \left( \hat{\beta}_i - \beta_{0,i} \right)}$ . Accordingly, we have  $\mathcal{I}_2 \leq 2\delta^{-1} \mathcal{O} \sqrt{(\varphi^2 + 1)n\sigma^2}$ , with a probability of  $1 - 2 \exp(-c_1 n)$ .

Combining the above results, we have that, with a probability of  $1 - 2 \exp(-c_1 n) - n^{-r}$ ,

$$c^* \left\{ \|\hat{\Theta} - \Theta_0\|_F^2 + \sum_{i=1}^n \left( \hat{\beta}_i - \beta_{0,i} \right)^\top x_i x_i^\top \left( \hat{\beta}_i - \beta_{0,i} \right) \right\} = c^* \left( \|\hat{\Theta} - \Theta_0\|_F^2 + \mathcal{O}^2 \right) \leq c'' \sqrt{n} \left( \|\hat{\Theta} - \Theta_0\|_F + \mathcal{O} \right), \quad (\text{S.1})$$

where  $c'' = \max \{ \sqrt{(2k+4)} C_A, 2/\delta \sqrt{(\varphi^2 + 1) \sigma^2} \}$ . By the Cauchy-Schwarz inequality, we have  $\|\hat{\Theta} - \Theta_0\|_F^2 + \mathcal{O}^2 \geq (\|\hat{\Theta} - \Theta_0\|_F + \mathcal{O})^2/2$ . This, together with (S.1), leads to  $\|\hat{\Theta} - \Theta_0\|_F + \mathcal{O} \leq 2c''/c^* \sqrt{n}$ . Accordingly,  $\|\hat{\Theta} - \Theta_0\|_F \leq \|\hat{\Theta} - \Theta_0\|_F + \mathcal{O} \leq 2c''/c^* \sqrt{n}$  with probability  $1 - 2 \exp(-c_1 n) - n^{-r}$ , which completes the proof of Step I.

**Step II:** Define  $\Theta = \mathcal{A} + \mathcal{Z}$ ,  $\mathcal{A} = \alpha \mathbf{1}_n^\top + \mathbf{1}_n \alpha^\top$  and  $\mathcal{Z} = Z Z^\top$ . After simple calculations, we obtain that

$$\|\hat{\Theta} - \Theta_0\|_F^2 = \|\hat{\mathcal{A}} - \mathcal{A}_0 + \hat{\mathcal{Z}} - \mathcal{Z}_0\|_F^2 = \|\hat{\mathcal{A}} - \mathcal{A}_0\|_F^2 + \|\hat{\mathcal{Z}} - \mathcal{Z}_0\|_F^2 + 2 \text{tr} \{ (\hat{\mathcal{A}} - \mathcal{A}_0) (\hat{\mathcal{Z}} - \mathcal{Z}_0) \}.$$

By the identification condition that  $J_n Z_0 = Z_0$  and  $J_n \hat{Z} = \hat{Z}$ , we have  $\mathbf{1}_n^\top Z_0 = \mathbf{1}_n^\top \hat{Z} = 0$ . This implies that

$$\text{tr} \{ (\hat{\mathcal{A}} - \mathcal{A}_0) (\hat{\mathcal{Z}} - \mathcal{Z}_0) \} = \text{tr} \left\{ (\hat{\alpha} - \alpha_0) \mathbf{1}_n^\top (\hat{Z} \hat{Z}^\top - Z_0 Z_0^\top) + (\hat{\alpha} - \alpha_0) (\hat{Z} \hat{Z}^\top - Z_0 Z_0^\top) \mathbf{1}_n \right\} = 0.$$

Accordingly,  $\|\hat{\Theta} - \Theta_0\|_F^2 = \|\hat{\mathcal{A}} - \mathcal{A}_0\|_F^2 + \|\hat{\mathcal{Z}} - \mathcal{Z}_0\|_F^2$ , which indicates that  $\|\hat{Z} \hat{Z}^\top - Z_0 Z_0^\top\|_F^2 = \|\hat{\mathcal{Z}} - \mathcal{Z}_0\|_F^2 \leq 4c''^2/c^{*2}n$  with a probability of  $1 - 2 \exp(-c_1 n) - n^{-r}$ . This, together with Lemma 3, leads to

$$\min_{O: O^\top O = O O^\top = I_k} \|\hat{Z} - Z_0 O\|_F^2 \leq \frac{1}{2(\sqrt{2} - 1) \lambda_k(Z_0^\top Z_0)} \|\hat{Z} \hat{Z}^\top - Z_0 Z_0^\top\|_F^2 \leq \frac{2c''^2}{(\sqrt{2} - 1) c^{*2} \tau_3},$$

with a probability of  $1 - 2 \exp(-c_1 n) - n^{-r}$ , which completes the entire proof.

Before introducing Lemma 5, let  $\hat{O} = \text{argmin}_{O: O^\top O = O O^\top = I_k} \|\hat{Z} - Z_0 O\|_F^2$  and  $\tilde{Z} := (\tilde{z}_1, \dots, \tilde{z}_n)^\top = \hat{Z} \hat{O}^\top$ , where  $\tilde{z}_i = (\tilde{z}_{i1}, \dots, \tilde{z}_{ik})^\top \in \mathbb{R}^k$  and  $\tilde{B} = \hat{B} \hat{O}^\top$ . To ease notation, we denote  $\tilde{W} = (\text{vec}(x_1 \tilde{z}_1^\top), \dots, \text{vec}(x_n \tilde{z}_n^\top))^\top$  and  $\tilde{H} = \begin{pmatrix} \tilde{W} & X \end{pmatrix}_{n \times p(k+1)}$ . In addition, let  $z_{0i} \in \mathbb{R}^k$  be the true latent vector of  $i$  and  $z_{0,il}$  be the  $l$ -th element of  $z_{0i}$ .

**Lemma 5.** Assume that Conditions (C1)–(C5) hold and  $p < (M_1^2 \tilde{c})^{-1} (\sqrt{\tau_1 + \tau_2} - \sqrt{\tau_2})^2 n$ , where  $\tilde{c}$  was defined in Lemma 4,  $M_1$  was defined in Condition (C1), and  $\tau_1$  and  $\tau_2$  were defined in Condition (C3). We then have that (i)  $\|\tilde{H} - H_0\|_F^2 \leq \tilde{c} M_1^2 p$ , and (ii) there exist two finite positive constants  $\tau_1^* \leq \tau_1$  and  $\tau_2^* \leq \tau_1 + \tau_2$  such that  $\tau_1^* < \lambda_{p(k+1)} \left( n^{-1} \tilde{H}^\top \tilde{H} \right) \leq \lambda_1 \left( n^{-1} \tilde{H}^\top \tilde{H} \right) < \tau_2^*$  with a probability of  $1 - 2 \exp(-c_1 n) - n^{-r}$ .

**Proof:** By Lemma 4, we have

$$\begin{aligned} \|\tilde{H} - H_0\|_F^2 &= \sum_{i=1}^n \left\| \left( \text{vec}^\top(x_i \tilde{z}_i^\top), x_i^\top \right)^\top - \left( \text{vec}^\top(x_i z_{0i}^\top), x_i^\top \right)^\top \right\|_2^2 \\ &= \sum_{i=1}^n \sum_{j=1}^p \sum_{l=1}^k x_{ij}^2 (\tilde{z}_{il} - z_{0,il})^2 \leq M_1^2 p \|\tilde{Z} - Z_0\|_F^2 \leq M_1^2 p \tilde{c}, \end{aligned} \quad (\text{S.2})$$

which completes Lemma 5 (i).

We next prove Lemma 5 (ii). By the Weyl inequality, we have

$$\begin{aligned} & \lambda_{p(k+1)}(n^{-1}H_0^\top H_0) - |\lambda_1(n^{-1}H_0^\top H_0 - n^{-1}\tilde{H}^\top \tilde{H})| \leq \lambda_{p(k+1)}(n^{-1}\tilde{H}^\top \tilde{H}) \\ & \leq \lambda_1(n^{-1}\tilde{H}^\top \tilde{H}) \leq \lambda_1(n^{-1}H_0H_0^\top) + |\lambda_1(n^{-1}H_0^\top H_0 - n^{-1}\tilde{H}^\top \tilde{H})|. \end{aligned}$$

By Condition (C3), it suffices to evaluate the bound of  $\lambda_1(n^{-1}H_0^\top H_0 - n^{-1}\tilde{H}^\top \tilde{H})$  to complete the proof. After simple calculations, we have

$$\begin{aligned} |\lambda_1(n^{-1}H_0^\top H_0 - n^{-1}\tilde{H}^\top \tilde{H})| &= n^{-1} \|H_0^\top H_0 - \tilde{H}^\top \tilde{H}\|_2 \\ &= n^{-1} \|(H_0 - \tilde{H})^\top H_0 + (H_0 - \tilde{H})^\top (H_0 - \tilde{H}) + H_0^\top (H_0 - \tilde{H})\|_2 \\ &\leq n^{-1} (2\|H_0\|_2 \|H_0 - \tilde{H}\|_2 + \|H_0 - \tilde{H}\|_2^2) \\ &\leq n^{-1} (2\sqrt{M_1^2 p \tilde{c} \tau_2 n} + M_1^2 p \tilde{c}) < \tau_1, \end{aligned}$$

where the first inequality is due to the Cauchy-Schwarz inequality, and the last inequality is by the result of Lemma 5 (i). Thus, there exist  $0 < \tau_1^* < \tau_1$  and  $\tau_2^* < \tau_1 + \tau_2$  such that  $\tau_1^* < \lambda_{p(k+1)}(n^{-1}\tilde{H}^\top \tilde{H}) \leq \lambda_1(n^{-1}\tilde{H}^\top \tilde{H}) < \tau_2^*$ , with a probability of  $1 - 2\exp(-c_1 n) - n^{-r}$ , which completes the entire proof.

Before presenting Lemma 6, denote  $S_1$  and  $S_2$  as the sets of nonzero rows in  $B_0$  and nonzero elements in  $\gamma_0$ , respectively, and let  $s_1$  and  $s_2$  be their corresponding numbers of elements in  $S_1$  and  $S_2$ . Let  $x_{iS_1} = (x_{ij} : j \in S_1)$  be the subvector of  $x_i$  associated with  $S_1$ . Define  $W^o = (\text{vec}(x_{1S_1} \hat{z}_1^{o\top}), \dots, \text{vec}(x_{nS_1} \hat{z}_n^{o\top}))^\top$  and  $H^o = (W^o, X_{\cdot S_2})_{n \times (s_1 k + s_2)}$ , where  $\hat{Z}^o = (\hat{z}_1^o, \dots, \hat{z}_n^o)^\top$  was defined in (S.9) and  $X_{\cdot S_2} = (X_{\cdot j} : j \in S_2)$  is the submatrix of  $X$  corresponding to  $S_2$ , where  $X_{\cdot j}$  is the  $j$ -th column  $X$ . In addition, let  $B_{S_1} = (B_i : i \in S_1)$  be the submatrix of  $B$ , and  $\gamma_{S_2} = (\gamma_j : j \in S_2)$  be the vector of  $\gamma$  associated with  $S_2$ . Denote  $\theta_S = (\text{vec}^\top(B_{S_1}), \gamma_{S_2}^\top)^\top$  and  $H_S$  be the submatrix of  $H$  corresponding to  $\theta_S$ . Analogously,  $\theta_{0,S}$ ,  $H_{0,S}$ , and  $H_{0,(j)}$  can be defined under  $Z_0$  and  $H_0$ .

**Lemma 6.** Assume that Conditions (C1)–(C5) hold and  $s_1 < (M_1^2 \tilde{c})^{-1}(\sqrt{\tau_1 + \tau_2} - \sqrt{\tau_2})^2 n$ , where  $\tilde{c}$  was defined in Lemma 4,  $M_1$  was defined in Condition (C1), and  $\tau_1$  and  $\tau_2$  were defined in Condition (C3). We then have that (i)  $\|H^o - H_{0,S}\|_F^2 \leq \tilde{c} M_1^2 s_1$ , and (ii) there exist finite positive constants  $\tau_1' \leq \tau_1$  and  $\tau_2' \leq \tau_1 + \tau_2$  such that  $\tau_1' < \lambda_{p(k+1)}(n^{-1}H^{o\top} H^o) \leq \lambda_1(n^{-1}H^{o\top} H^o) < \tau_2'$  with a probability of  $1 - 2\exp(-c_1 n) - n^{-r}$ .

## S.2 Proof of Theorem 1

Let  $\tilde{\theta} = (\text{vec}^\top(\tilde{B}), \hat{\gamma})^\top$ , and denote its corresponding true parameter  $\theta_0$ . To prove this theorem, we first obtain an upper bound of  $\|\tilde{\theta} - \theta_0\|_2^2$ . Then, using the fact that  $\min_{O: O^\top O = O^\top O = I_k} \|\hat{B} - B_0 O\|_F \leq \|\tilde{\theta} - \theta_0\|_2$  and  $\|\hat{\gamma} - \gamma_0\|_2 \leq \|\tilde{\theta} - \theta_0\|_2$ , we can complete the proof of Theorem 1. Note that  $\tilde{\theta}$  minimizes the mean squared loss in equation (5) for given  $\tilde{Z}$  defined above

Lemma 5. Then, by the first-order condition, we have  $\tilde{\theta} = (\tilde{H}^\top \tilde{H})^{-1} \tilde{H}^\top Y$ . Subsequently,

$$\begin{aligned} \|\tilde{\theta} - \theta_0\|_2 &= \|(\tilde{H}^\top \tilde{H})^{-1} \tilde{H}^\top (H_0 \theta_0 + \varepsilon) - \theta_0\|_2 \\ &= \|(\tilde{H}^\top \tilde{H})^{-1} \tilde{H}^\top (H_0 - \tilde{H}) \theta_0 + (\tilde{H}^\top \tilde{H})^{-1} \tilde{H}^\top \varepsilon\|_2 \\ &\leq \|(\tilde{H}^\top \tilde{H})^{-1} \tilde{H}^\top (H_0 - \tilde{H}) \theta_0\|_2 + \|(\tilde{H}^\top \tilde{H})^{-1} \tilde{H}^\top \varepsilon\|_2 \doteq I_1 + I_2. \end{aligned}$$

We next evaluate  $I_1$  and  $I_2$  separately. By Lemma 5 (ii), we have that

$$\begin{aligned} I_1 &\leq \|n^{-1} (n^{-1} \tilde{H}^\top \tilde{H})^{-1} \tilde{H}^\top (H_0 - \tilde{H})\|_2 \|\theta_0\|_2 \\ &\leq \frac{1}{\tau_1^* n} \|\tilde{H}\|_2 \|\tilde{H} - H_0\|_2 \|\theta_0\|_2 \leq \frac{\sqrt{\tau_2^*}}{\tau_1^* \sqrt{n}} \|\tilde{H} - H_0\|_2 \|\theta_0\|_2. \end{aligned} \quad (\text{S.3})$$

In addition, by Lemma 5 (i), we obtain that  $\|\tilde{H} - H_0\|_F^2 \leq \tilde{c} M_1^2 p$ , with a probability of  $1 - 2 \exp(-c_1 n) - n^{-r}$ . This result, together with (S.3) and  $\|\tilde{H} - H_0\|_2 \leq \|\tilde{H} - H_0\|_F$ , leads to

$$I_1 \leq \tau_1^{*-1} n^{-1/2} M_1 \sqrt{\tau_2^* \tilde{c} p} \|\theta_0\|_2. \quad (\text{S.4})$$

As for  $I_2$ , we have

$$I_2 = \|n^{-1} (n^{-1} \tilde{H}^\top \tilde{H})^{-1} \tilde{H}^\top \varepsilon\|_2 \leq \frac{1}{\tau_1^* n} \|\tilde{H}^\top \varepsilon\|_2 \leq \frac{1}{\tau_1^* n} (\|\tilde{H} - H_0\|_2 \|\varepsilon\|_2 + \|H_0^\top \varepsilon\|_2), \quad (\text{S.5})$$

where the first inequality is due to Lemma 5 (ii) and the second inequality follows from the triangle inequality. As given above,  $\|\tilde{H} - H_0\|_2 \leq \|\tilde{H} - H_0\|_F \leq \sqrt{\tilde{c} M_1^2 p}$ , with a probability of  $1 - 2 \exp(-c_1 n) - n^{-r}$ . In addition, by Lemma 1, we obtain that

$$Pr(\|\varepsilon\|_2 \geq \sqrt{(\varphi^2 + 1) n \sigma^2}) \leq 2 \exp(-c_1 n) \text{ and} \quad (\text{S.6})$$

$$Pr\left(\|H_0^\top \varepsilon\|_2 \geq \sqrt{(\text{tr}(H_0 H_0^\top) + t) \sigma^2}\right) \leq 2 \exp\left[-c_1 \min\{t^2 \varphi^{-4} \|H_0 H_0^\top\|_F^{-2}, t \varphi^{-2} \|H_0 H_0^\top\|_2^{-1}\}\right].$$

Moreover, by Condition (C3),  $\text{tr}(H_0 H_0^\top) \leq np(k+1)\tau_2$ ,  $\|H_0 H_0^\top\|_F^2 = n^2 \text{tr}\{(n^{-1} H_0^\top H_0)^2\} \leq n^2 p(k+1)\tau_2^2$ , and  $\|H_0 H_0^\top\|_2 = n \lambda_1(n^{-1} H_0^\top H_0) \leq n \tau_2$ . Let  $t = c_t np(k+1)\tau_2 \varphi^2$  for  $c_t > 1$ . Then, we obtain

$$\min\{t^2 \varphi^{-4} \|H_0 H_0^\top\|_F^{-2}, t \varphi^{-2} \|H_0 H_0^\top\|_2^{-1}\} \geq c_t p(k+1),$$

which immediately leads to

$$Pr\left(\|H_0^\top \varepsilon\|_2 \geq \sqrt{(c_t \varphi^2 + 1) \tau_2 np(k+1) \sigma^2}\right) \leq 2 \exp\{-c_1 c_t p(k+1)\}. \quad (\text{S.7})$$

This, together with (S.5) and (S.6), leads to

$$I_2 \leq \tau_1^{*-1} n^{-1/2} \left\{ M_1 \sqrt{p \tilde{c} (\varphi^2 + 1) \sigma^2} + \sqrt{(c_t \varphi^2 + 1) \tau_2 p(k+1) \sigma^2} \right\}. \quad (\text{S.8})$$

Combining the results in (S.4) and (S.8), we obtain that

$$\|\tilde{\theta} - \theta_0\|_2 \leq \frac{1}{\tau_1^* \sqrt{n}} \left\{ \left( \sqrt{\tau_2^*} \|\theta_0\|_2 + \sqrt{(\varphi^2 + 1) \sigma^2} \right) M_1 \sqrt{p\tilde{c}} + \sqrt{(c_t \varphi^2 + 1) \tau_2 p (k+1) \sigma^2} \right\}$$

with a probability of  $1 - 2 \exp \{-c_1 c_t p (k+1)\} - 2 \exp(-c_1 n) - n^{-r}$ . Since  $\min_{O: O^\top O = O^\top O = I_k} \|\hat{B} - B_0 O\|_F \leq \|\tilde{\theta} - \theta_0\|_2$  and  $\|\hat{\gamma} - \gamma_0\|_2 \leq \|\tilde{\theta} - \theta_0\|_2$ , we have completed the proof of Theorem 1.

### S.3 Proof of Theorem 2

By the definition of  $\hat{\mathcal{T}}$ , we have

$$\begin{aligned} \|\hat{\mathcal{T}} - \mathcal{T}_0\|_F &\leq \|\tilde{Z}\tilde{B}^\top - Z_0 B_0^\top\|_F + \|\mathbf{1}_n \hat{\gamma}^\top - \mathbf{1}_n \gamma_0^\top\|_F \\ &\leq \|\tilde{Z}\tilde{B}^\top - Z_0 B_0^\top\|_F + \sqrt{n} \|\hat{\gamma} - \gamma_0\|_2 \\ &\leq \|\tilde{Z}\tilde{B}^\top - Z_0 \tilde{B}^\top + Z_0 \tilde{B}^\top - Z_0 B_0^\top\|_F + \sqrt{n} \|\hat{\gamma} - \gamma_0\|_2 \\ &\leq \|\tilde{B}\|_F \|\tilde{Z} - Z_0\|_F + \|Z_0\|_F \|\tilde{B} - B_0\|_F + \sqrt{n} \|\hat{\gamma} - \gamma_0\|_2 \\ &\doteq \check{I}_1 + \check{I}_2 + \check{I}_3. \end{aligned}$$

We study the above three parts  $\check{I}_1$ ,  $\check{I}_2$  and  $\check{I}_3$  separately.

By Lemma 4 and the proof of Theorem 1, we obtain

$$\check{I}_1 \leq \left( \|B_0\|_F + \|\tilde{B} - B_0\|_F \right) \|\tilde{Z} - Z_0\|_F \leq (\|B_0\|_F + C_\theta / \sqrt{n}) \tilde{c}^{1/2}$$

with a probability of  $1 - 2 \exp \{-c_1 c_t p (k+1)\} - 2 \exp(-c_1 n) - n^{-r}$ , where  $C_\theta$  was defined in Theorem 1. In addition, by Condition (C4) and the proof of Theorem 1, we have  $\check{I}_2 \leq \sqrt{\tau_4} C_\theta$  and  $\check{I}_3 \leq C_\theta$ , with a probability of  $1 - 2 \exp \{-c_1 c_t p (k+1)\} - 2 \exp(-c_1 n) - n^{-r}$ . The above results imply that

$$\|\hat{\mathcal{T}} - \mathcal{T}_0\|_F \leq (\|B_0\|_F + C_\theta / \sqrt{n}) \tilde{c}^{1/2} + (\sqrt{\tau_4} + 1) C_\theta,$$

with a probability of  $1 - 2 \exp \{-c_1 c_t p (k+1)\} - 2 \exp(-c_1 n) - n^{-r}$ , which completes the proof.

### S.4 Proof of Theorem 3

To prove this theorem, we first introduce some notation. Let  $Q(Z, \alpha, \theta)$  represent the objective function to be minimized in equation (8), and it is

$$Q(Z, \alpha, \theta) = L(Z, \alpha, B, \gamma) + 2n\delta^{-1} \sum_{j=1}^p \left\{ \rho(\|B_{j\cdot}\|_2, \mu) + \rho(|\gamma_j|, \mu) \right\},$$

where  $\theta = (\text{vec}^\top(B), \gamma^\top)^\top$ . Define  $\theta_{(j)} = B_{j\cdot}$  and  $\theta_{(j+p)} = \gamma_j$  for  $j = 1, \dots, p$ . Let  $H_{(j)}$  be the submatix of  $H$  corresponding to  $\theta_{(j)}$ . In addition, define  $\check{\theta}_{(j)}$ s such that  $\check{\theta}_{(j)} = \theta_{(j)}$  if

$j \in S$  and  $\check{\theta}_{(j)} = 0$  otherwise, and  $\check{\theta}$  is the corresponding version of  $\theta$ . Denote  $\hat{\alpha}^o, \hat{\theta}^o$  and  $\hat{Z}^o$  as the associated oracle estimators, that is

$$(\hat{Z}^o, \hat{\alpha}^o, \hat{\theta}^o) = \operatorname{argmin}_{(Z, \alpha, \theta) \in \mathcal{F}} Q(Z, \alpha, \theta) \text{ subject to } \theta_{(j)} = 0 \text{ if } j \notin S. \quad (\text{S.9})$$

The oracle estimates of  $\theta_{(j)}$ ,  $B$ , and  $\gamma$  are denoted by  $\hat{\theta}_{(j)}^o$ ,  $\hat{B}^o$ , and  $\hat{\gamma}^o$ , respectively, where  $j = 1, \dots, 2p$ . Let  $\hat{O}^o = \operatorname{argmin}_{O: O^\top O = O O^\top = I_k} \|\hat{Z}^o - Z_0 O\|_F^2$ . For the sake of simplicity, we assume  $\hat{O}^o = I_k$  and the orthogonal transformations corresponding to all estimates are the identity matrix. We next prove Theorem 3 in two steps. In step I, we show that  $\hat{\mathcal{T}}^o = \hat{Z}^o \hat{B}^{o\top} + \mathbf{1}_n \hat{\gamma}^{o\top}$  satisfies  $\|\hat{\mathcal{T}}^o - \mathcal{T}_0\|_F = O_p(s)$ . In step II, we prove that  $(\hat{Z}^o, \hat{\alpha}^o, \hat{\theta}^o)$  is a local solution of equation (8).

**Step I:** Employing the similar techniques as those used in the proof of Lemma 4 and Theorem 1, with a probability not less than  $1 - 2 \exp(-c_1 n) - n^{-r} - 2 \exp\{-c_1 c_t (s_1 k + s_2)\}$ , we have that  $\|\hat{Z}^o - Z_0\|_F^2 \leq \tilde{c}$  and  $\|\hat{\theta}^o - \theta_0\|_2 \leq C'_\theta n^{-1/2}$ , where  $C'_\theta = \tau_1'^{-1} \left[ (\sqrt{\tau_2'} (\|B_0\|_F^2 + \|\gamma_0\|_2^2))^{1/2} + \sqrt{(\varphi^2 + 1) \sigma^2} M_1 \sqrt{s_1 \tilde{c}} + \sqrt{\tau_2 (c_t \varphi^2 + 1) (s_1 k + s_2) \sigma^2} \right]$ ,  $\tau_1'$  and  $\tau_2'$  were defined in Lemma 6,  $\tilde{c}$  was defined in Lemma 4, and  $c_t$  can be any constant greater than 1. In addition, applying the similar techniques to those used in proving Theorem 2, together with the above results, we obtain that

$$\begin{aligned} \|\hat{\mathcal{T}}^o - \mathcal{T}_0\|_F &\leq \|\hat{Z}^o \hat{B}^{o\top} - Z_0 B_0^\top\|_F + \|\mathbf{1}_n \hat{\gamma}^{o\top} - \mathbf{1}_n \gamma_0^\top\|_F \\ &\leq \|\hat{Z}^o \hat{B}^{o\top} - Z_0 B_0^\top\|_F + \sqrt{n} \|\hat{\gamma}^o - \gamma_0\|_2 \\ &\leq \|\hat{Z}^o \hat{B}^{o\top} - Z_0 \hat{B}^{o\top} + Z_0 \hat{B}^{o\top} - Z_0 B_0^\top\|_F + \sqrt{n} \|\hat{\gamma}^o - \gamma_0\|_2 \\ &\leq \|\hat{B}^o\|_F \|\hat{Z}^o - Z_0\|_F + \|Z_0\|_F \|\hat{B}^o - B_0\|_F + \sqrt{n} \|\hat{\gamma}^o - \gamma_0\|_2 \\ &\leq (\|B_0\|_F + C'_\theta / \sqrt{n}) \tilde{c}^{1/2} + (\sqrt{\tau_4} + 1) C'_\theta, \end{aligned}$$

with probability tending to 1 as  $\{n, s_1, s_2\} \rightarrow \infty$ . Since  $k < \infty$  by definition, we then have  $\|B_0\|_F = O(\sqrt{s_1})$  and  $C'_\theta = O_p(\sqrt{(s_1 + s_2)s_1})$ , which immediately leads to  $\|\hat{\mathcal{T}}^o - \mathcal{T}_0\|_F = O_p(s_1 + s_2) = O_p(s)$ . This completes the proof of Step I.

**Step II:** Define a neighborhood of the true parameters  $\theta_0$ ,  $\alpha_0$  and  $Z_0$  as

$$\mathcal{F}^o = \mathcal{F} \cap \left\{ Z, \alpha, \theta : \|Z - Z_0\|_F^2 \leq \tilde{c}, \|\theta - \theta_0\|_2 \leq C'_\theta n^{-1/2} \right\}.$$

Let event  $\mathbb{E}_{v1}$  be  $(\hat{Z}^o, \hat{\alpha}^o, \hat{\theta}^o) \in \mathcal{F}^o$ . According to the result of Step I, the probability of  $\mathbb{E}_{v1}$  is not less than  $1 - 2 \exp(-c_1 n) - n^{-r} - 2 \exp\{-c_1 c_t (s_1 k + s_2)\}$ . To prove that  $(\hat{Z}^o, \hat{\alpha}^o, \hat{\theta}^o)$  is a local solution of equation (8), it suffices to show the following two parts:

**Part (i).** For any  $(Z, \alpha, \theta) \in \mathcal{F}^o$ ,

$$Q(Z, \alpha, \check{\theta}) \geq Q(\hat{Z}^o, \hat{\alpha}^o, \hat{\theta}^o) \text{ over the event } \mathbb{E}_{v1};$$

**Part (ii).** For any  $(Z, \alpha, \theta) \in \mathcal{F}^o$ , there exists an event  $\mathbb{E}_{v2}$  with high probability, such that

$$Q(Z, \alpha, \theta) \geq Q(Z, \alpha, \check{\theta}) \text{ over the event } \mathbb{E}_{v1} \cap \mathbb{E}_{v2}.$$

To prove **Part (i)**, we have that

$$\begin{aligned}
& Q(Z, \alpha, \check{\theta}) - Q(\hat{Z}^o, \hat{\alpha}^o, \hat{\theta}^o) \\
&= L(Z, \alpha, \check{\theta}) - L(\hat{Z}^o, \hat{\alpha}^o, \hat{\theta}^o) + 2n\delta^{-1} \sum_{j=1}^{2p} \rho(\|\check{\theta}_{(j)}\|_2, \mu) - 2n\delta^{-1} \sum_{j=1}^p \rho(\|\hat{\theta}_{(j)}^o\|_2, \mu) \\
&\doteq \mathbb{M}_1 + \mathbb{M}_2,
\end{aligned} \tag{S.10}$$

where  $\mathbb{M}_1 = L(Z, \alpha, \check{\theta}) - L(\hat{Z}^o, \hat{\alpha}^o, \hat{\theta}^o)$  and  $\mathbb{M}_2 = 2n\delta^{-1} \sum_{j=1}^{2p} \rho(\|\check{\theta}_{(j)}\|_2, \mu) - 2n\delta^{-1} \sum_{j=1}^p \rho(\|\hat{\theta}_{(j)}^o\|_2, \mu)$ . We next study  $\mathbb{M}_1$  and  $\mathbb{M}_2$  separately.

By the definition of oracle estimators, we have that  $\mathbb{M}_1 \geq 0$ . As for  $\mathbb{M}_2$ , for any  $j \notin S$ ,  $\check{\theta}_{(j)} = \hat{\theta}_{(j)}^o = 0$ , which leads to  $\rho(\|\check{\theta}_{(j)}\|_2, \mu) = \rho(\|\hat{\theta}_{(j)}^o\|_2, \mu) = 0$ . In addition, for any  $j \in S$ , by Condition (C6),  $\|\check{\theta}_{(j)}\|_2 \geq \|\theta_{0,(j)}\|_2 - \|\theta_{0,(j)} - \check{\theta}_{(j)}\|_2 > \kappa\mu$ . As a result,  $\rho(\|\check{\theta}_{(j)}\|_2, \mu) = \mu \int_0^{\|\check{\theta}_{(j)}\|_2} (1 - x/(\mu\kappa))_+ dx = \mu^2\kappa/2$ . Analogously, we can show that, over  $\mathbb{E}_{v1}$ ,  $\|\hat{\theta}_{(j)}^o\|_2 \geq \|\theta_{0,(j)}\|_2 - \|\theta_{0,(j)} - \hat{\theta}_{(j)}^o\|_2 > \kappa\mu$ . Then, we obtain that  $\rho(\|\hat{\theta}_{(j)}^o\|_2, \mu) = \mu^2\kappa/2$ , which immediately leads to  $\mathbb{M}_2 = 0$ . This, together with  $\mathbb{M}_1 \geq 0$  and (S.10), completes the proof of **Part (i)**.

We next demonstrate **Part (ii)**. Define  $S_\theta = \{j : \theta_{(j)} \neq 0\} \cap S^c$ . By Taylor's expansion, we have that

$$\begin{aligned}
& Q(Z, \alpha, \theta) - Q(Z, \alpha, \check{\theta}) \\
&= L(Z, \alpha, \theta) - L(Z, \alpha, \check{\theta}) + 2n\delta^{-1} \sum_{j \in S_\theta} \rho(\|\theta_{(j)}\|_2, \mu) \\
&= 2 \sum_{j \in S_\theta} (Y - H\theta^*)^\top H_{(j)}(\theta_{(j)} - \check{\theta}_{(j)}) + 2n\delta^{-1} \dot{\rho}(\|\theta_{(j)}^*\|_2, \mu) \frac{\theta_{(j)}^*}{\|\theta_{(j)}^*\|_2} (\theta_{(j)} - \check{\theta}_{(j)}) \\
&= 2 \sum_{j \in S_\theta} (Y - H\theta^*)^\top H_{(j)}(\theta_{(j)} - \check{\theta}_{(j)}) + 2n\delta^{-1} \sum_{j \in S_\theta} \dot{\rho}(\|\theta_{(j)}^*\|_2, \mu) \|\theta_{(j)} - \check{\theta}_{(j)}\|_2 \\
&\doteq 2\bar{M}_1 + 2\bar{M}_2,
\end{aligned}$$

where  $\theta^* = \iota\theta + (1 - \iota)\check{\theta}$  for some  $\iota \in (0, 1)$ , and  $\dot{\rho}(\cdot)$  is the derivative function of  $\rho(\cdot)$ .

We evaluate  $\bar{M}_1$  and  $\bar{M}_2$  separately. By the definition of MCP,  $\dot{\rho}(x, \mu) \geq 0$  for any  $x > 0$ . This implies that  $\bar{M}_2 \geq 0$ . Furthermore, we obtain

$$\bar{M}_2 = n\delta^{-1} \sum_{j \in S_\theta} \dot{\rho}(\|\theta_{(j)}^*\|_2, \mu) \|\theta_{(j)} - \check{\theta}_{(j)}\|_2 = n\delta^{-1} \sum_{j \in S_\theta} \mu (1 - \|\theta_{(j)}^*\|_2 (\mu\kappa)^{-1})_+ \|\theta_{(j)} - \check{\theta}_{(j)}\|_2.$$

Note that  $\theta^* = \iota\theta + (1 - \iota)\check{\theta}$  for some  $\iota \in (0, 1)$ , which leads to  $\|\theta_{(j)}^*\|_2 \leq \iota\|\theta_{(j)}\|_2 + (1 - \iota)\|\check{\theta}_{(j)}\|_2$ . By the definition of  $\check{\theta}$ , we have  $\|\check{\theta}_{(j)}\|_2 \leq \|\theta_{(j)}\|_2$ . Thus,  $\|\theta_{(j)}^*\|_2 \leq \|\theta_{(j)}\|_2$ . For  $j \in S_\theta$ , we have  $\theta_{0,(j)} = 0$ . For any  $(Z, \alpha, \theta) \in \mathcal{F}^o$ , we have  $\max_{j \in S_\theta} \|\theta_{(j)}\|_2 = \max_{j \in S_\theta} \|\theta_{(j)} - \theta_{0,(j)}\|_2 \leq \|\theta - \theta_0\|_2 \leq C'_\theta n^{-1/2}$ . Thus,  $\max_{j \in S_\theta} \|\theta_{(j)}^*\|_2 \leq C'_\theta n^{-1/2}$ . By Condition (C6), we can obtain  $C'_\theta n^{-1/2} \leq C_\mu \mu \kappa$  and  $C_\mu < 1$ . Accordingly, we have

$$\bar{M}_2 \geq (n/\delta) (1 - C_\mu) \mu \sum_{j \in S_\theta} \|\theta_{(j)} - \check{\theta}_{(j)}\|_2 > 0.$$



As for  $\bar{M}_1$ , we employ the Hölding inequality and obtain that

$$\begin{aligned}
|\bar{M}_1| &\leq \sum_{j \in S_\theta} \|H_{(j)}^\top (Y - H\theta^*)\|_2 \|\theta_{(j)} - \check{\theta}_{(j)}\|_2 \\
&\leq \sum_{j \in S_\theta} \|H_{(j)}^\top (\varepsilon + H_0\theta_0 - H\theta_0 + H\theta_0 - H\theta^*)\|_2 \|\theta_{(j)} - \check{\theta}_{(j)}\|_2 \\
&\leq \sum_{j \in S_\theta} (\|H_{(j)}^\top \varepsilon\|_2 + \|H_{(j)}\|_2 \|H_{0,S} - H_S\|_2 \|\theta_{0,S}\|_2 + \|H_{(j)}\|_2 \|H\|_2 \|\theta_0 - \theta^*\|_2) \|\theta_{(j)} - \check{\theta}_{(j)}\|_2.
\end{aligned}$$

Since  $(Z, \alpha, \theta) \in \mathcal{F}^o$ , we have

$$\max_{j \in S_\theta} \|H_{(j)} - H_{0,(j)}\|_2 \leq \max_{j \in S_\theta} \left\{ \sum_{i=1}^n \sum_{l=1}^k x_{ij}^2 (z_{il} - z_{0,il})^2 \right\}^{1/2} \leq M_1 \|Z - Z_0\|_F \leq M_1 \tilde{c}^{1/2}.$$

In addition, Condition (C3) implies that  $\max_j \|H_{0,(j)}\|_2 \leq \sqrt{\tau_2 n}$ . Accordingly,  $\max_j \|H_{(j)}\|_2 \leq \max_j \|H_{0,(j)} - H_{(j)}\|_2 + \max_j \|H_{0,(j)}\|_2 \leq M_1 \tilde{c}^{1/2} + \sqrt{\tau_2 n}$ . Analogously, we obtain that

$$\|H_{0,S} - H_S\|_2 \leq M_1 \sqrt{s_1 \tilde{c}}, \text{ and } \|H\|_2 \leq M_1 \sqrt{p \tilde{c}} + \sqrt{\tau_2 n}.$$

Combining the above results, we then have

$$\begin{aligned}
|\bar{M}_1| &\leq \sum_{j \in S_\theta} \left[ \|H_{(j)}^\top \varepsilon\|_2 + (\sqrt{\tau_2 n} + M_1 \tilde{c}^{1/2}) \left\{ M_1 \sqrt{s_1 \tilde{c}} \|\theta_0\|_2 + n^{-1/2} C'_\theta (M_1 \sqrt{p \tilde{c}} + \sqrt{\tau_2 n}) \right\} \right] \|\theta_{(j)} - \check{\theta}_{(j)}\|_2 \\
&= \sum_{j \in S_\theta} \Xi_j \|\theta_{(j)} - \check{\theta}_{(j)}\|_2.
\end{aligned}$$

Subsequently, we define the event  $\mathbb{E}_{v2} = \{\max_{j \in S_\theta} J_j \leq \tilde{\mu} \sigma\}$ , where  $J_j = \|H_{(j)}^\top \varepsilon\|_2$  and  $\tilde{\mu} = (n/\delta)(1 - C_\mu)\mu/\sigma - (\sqrt{\tau_2 n} + M_1 \tilde{c}^{1/2}) \{M_1 \sqrt{s_1 \tilde{c}} \|\theta_0\|_2 + n^{-1/2} C'_\theta (M_1 \sqrt{p \tilde{c}} + \sqrt{\tau_2 n})\}/\sigma$  was defined in Condition (C7). Over  $\mathbb{E}_{v2}$ ,

$$\bar{M}_1 + \bar{M}_2 \geq \bar{M}_2 - |\bar{M}_1| \geq \sum_{j \in S_\theta} ((n/\delta)(1 - C_\mu)\mu - \Xi_j) \|\theta_{(j)} - \check{\theta}_{(j)}\|_2 \geq 0.$$

Accordingly, over  $\mathbb{E}_{v2} \cap \mathbb{E}_{v1}$ , we have that  $Q(Z, \alpha, \theta) \geq Q(Z, \alpha, \check{\theta})$ , which completes the proof of **Part (ii)**.

We finally show the bound of the probability of  $\mathbb{E}_{v2}$ . For  $J_j$ , we have

$$\begin{aligned}
Pr(\max_{j \in S_\theta} J_j > \tilde{\mu} \sigma) &\leq Pr \left[ \max_{j \in S_\theta} \{ \|H_{(j)} - H_{0,(j)}\|_2 \|\varepsilon\|_2 + \|H_{0,(j)}^\top \varepsilon\|_2 \} \geq \tilde{\mu} \sigma \right] \\
&\leq Pr \left[ \max_{j \in S_\theta} \|H_{(j)} - H_{0,(j)}\|_2 \|\varepsilon\|_2 \geq 2^{-1} \tilde{\mu} \sigma \right] \\
&\quad + Pr \left[ \max_{j \in S_\theta} \|H_{0,(j)}^\top \varepsilon\|_2 \geq 2^{-1} \tilde{\mu} \sigma \right]. \tag{S.11}
\end{aligned}$$

For the first part of (S.11), we have

$$\begin{aligned}
& Pr \left[ \max_{j \in S_\theta} \|H_{(j)} - H_{0,(j)}\|_2 \|\varepsilon\|_2 \geq 2^{-1} \tilde{\mu} \sigma \right] \\
& \leq Pr \{ \|\varepsilon\|_2 > (2M_1 \tilde{c}^{1/2})^{-1} \tilde{\mu} \sigma \} \\
& = Pr \left\{ \|\varepsilon/\sigma\|_2^2 - n > (2M_1 \tilde{c}^{1/2})^{-2} \tilde{\mu}^2 - n \right\}.
\end{aligned}$$

Let  $t = (2M_1 \tilde{c}^{1/2})^{-2} \tilde{\mu}^2 - n$  in Lemma 1. Then, by Lemma 1, we have

$$Pr \{ \|\varepsilon\|_2 > (2M_1 \tilde{c}^{1/2})^{-1} \tilde{\mu} \sigma \} \leq 2 \exp \left\{ -c_1 \min(t^2 \varphi^{-4} n^{-1}, t \varphi^{-2}) \right\}.$$

Note that  $\tilde{\mu}^2 > 4M_1^2 \tilde{c} (\varphi^2 + 1) n$ , we then have  $Pr \{ \|\varepsilon\|_2 > (2M_1 \tilde{c}^{1/2})^{-1} \tilde{\mu} \sigma \} \leq 2 \exp \{-c_1 n\}$ , which immediately leads to

$$Pr \left[ \max_{j \in S_\theta} \|H_{(j)} - H_{0,(j)}\|_2 \|\varepsilon\|_2 \geq 2^{-1} \tilde{\mu} \sigma \right] \leq 2 \exp \{-c_1 n\}. \quad (\text{S.12})$$

For the second part of (S.11), we have

$$Pr \left[ \max_{j \in S_\theta} \|H_{0,(j)}^\top \varepsilon\|_2 \geq 1/2 \tilde{\mu} \sigma \right] \leq \sum_{j=1}^p Pr(\varepsilon^\top H_{0,(j)} H_{0,(j)}^\top \varepsilon \geq 1/4 \tilde{\mu}^2 \sigma^2).$$

By Condition (C3), we have that  $\|H_{0,(j)} H_{0,(j)}^\top\|_F^2 \leq n^2 k \tau_2^2$ ,  $\|H_{0,(j)} H_{0,(j)}^\top\|_2 \leq n \tau_2$ , and  $\text{tr}(H_{0,(j)} H_{0,(j)}^\top) \leq k n \tau_2$ . Then, we obtain

$$\begin{aligned}
& Pr \left[ (\varepsilon^\top / \sigma) H_{0,(j)} H_{0,(j)}^\top (\varepsilon / \sigma) - \text{tr}(H_{0,(j)} H_{0,(j)}^\top) \geq 1/4 \tilde{\mu}^2 - \text{tr}(H_{0,(j)} H_{0,(j)}^\top) \right] \\
& \leq Pr \left[ (\varepsilon^\top / \sigma) H_{0,(j)} H_{0,(j)}^\top (\varepsilon / \sigma) - \text{tr}(H_{0,(j)} H_{0,(j)}^\top) \geq 1/4 \tilde{\mu}^2 - k \tau_2 n \right].
\end{aligned}$$

Set  $t = \tilde{\mu}^2/4 - k \tau_2 n$  in Lemma 1. Then, by Lemma 1, we have

$$\begin{aligned}
& Pr \left[ (\varepsilon^\top / \sigma) H_{0,(j)} H_{0,(j)}^\top (\varepsilon / \sigma) - \text{tr}(H_{0,(j)} H_{0,(j)}^\top) \geq 1/4 \tilde{\mu}^2 - k \tau_2 n \right] \\
& \leq 2 \exp \left\{ -c_1 \min(t^2 \varphi^{-4} \|H_{0,(j)} H_{0,(j)}^\top\|_F^{-2}, t \varphi^{-2} \|H_{0,(j)} H_{0,(j)}^\top\|_2^{-1}) \right\}.
\end{aligned}$$

Since  $\tilde{\mu}^2 > 4(2\varphi^2 \log p / (c_1 k) + 1) k \tau_2 n$ , we then have that

$$Pr \left[ \max_{j \in S_\theta} \|H_{0,(j)}^\top \varepsilon\|_2 \geq \tilde{\mu} \sigma / 2 \right] \leq 2p \exp \left\{ -c_1 \left( \frac{1}{4} \tilde{\mu}^2 - k \tau_2 n \right) \varphi^{-2} (n \tau_2)^{-1} \right\} \leq 2p^{-1}. \quad (\text{S.13})$$

By (S.11), (S.12) and (S.13), we have that the probability of  $\mathbb{E}_{v_2}$  is not less than  $1 - 2 \exp(-c_1 n) - 2p^{-1}$ , and the probability of  $\mathbb{E}_{v_1} \cap \mathbb{E}_{v_2}$  is not less than  $1 - 4 \exp(-c_1 n) - n^{-r} - 2 \exp\{-c_1 c_t (s_1 k + s_2)\} - 2p^{-1}$ . Combining the above results, we have completed the entire proof.

## S.5 Additional discussion on Condition (C3)

To ensure the identifiability of the regression model, we introduce  $\lambda_{p(k+1)} (n^{-1} H_0^\top H_0) > \tau_1$  in the first part of Condition (C3), where  $\tau_1$  is a finite positive constant. This section establishes the relationship between Condition (C3) and the collinearity between  $X$  and  $Z_0$ .

Define  $\check{z}_i = (1, z_{0i}^\top)^\top$ . After straightforward calculations, we have  $\lambda_{p(k+1)} (n^{-1} H_0^\top H_0) > \tau_1$ , which is equivalent to  $\lambda_{p(k+1)} \left\{ \frac{1}{n} \sum_{i=1}^n ((x_i x_i^\top) \otimes (\check{z}_i \check{z}_i^\top)) \right\} > \tau_1$ . For the sake of simplicity and to illustrate collinearity, we assume that  $(x_i, z_{0i})$  are independent and identically distributed random vectors. To characterize the dependence between  $x_i$  and  $z_{0i}$ , we assume that

$$x_i = f_z(z_{0i}) + \xi_i, \text{ for } i = 1, \dots, n, \quad (\text{S.14})$$

where  $f_z : \mathbb{R}^k \rightarrow \mathbb{R}^p$  is an unknown function,  $\xi_i = (\xi_{i1}, \dots, \xi_{ip})^\top$  has mean zero and covariance  $\Sigma_\xi$ , and the  $\xi_i$ s are independent of the  $z_{0i}$ s. Model (S.14) includes the following two special cases.

**Case (a):** If  $f_z(z_{0i}) = C_z z_{0i}$  for some matrix  $C_z \in \mathbb{R}^{p \times k}$ , then model (S.14) is the same as that in Binkiewicz et al. (2017) except that  $z_{0i}$  is the location of node  $i$  rather than the membership vector.

**Case (b):** Consider the case that there are repeated measures in the nodal covariates and latent positions. Let  $v_i \in \mathbb{R}^l$  be the repeated measure with  $l \leq k$ . Assume that  $z_{0i} = \mathbb{C}_z v_i + \xi_{zi}$  and  $x_i = \mathbb{C}_x v_i + \xi_{xi}$ , where  $\mathbb{C}_z \in \mathbb{R}^{k \times l}$  and  $\mathbb{C}_x \in \mathbb{R}^{p \times l}$  are two matrices. Without loss of generality, we assume that the first  $l$  rows of  $\mathbb{C}_z$ ,  $\mathbb{C}_{z,1:l,\cdot}$ , are invertible. Denote  $\mathbb{C}_v = (\mathbb{C}_{z,1:l,\cdot}^{-1}, 0) \in \mathbb{R}^{l \times k}$ . We then have  $x_i = \mathbb{C}_x \mathbb{C}_v z_{0i} - \mathbb{C}_x \mathbb{C}_v \xi_{zi} + \xi_{xi}$ . Let  $f_z(z_{0i}) = \mathbb{C}_x \mathbb{C}_v z_{0i}$  and  $\xi_i = -\mathbb{C}_x \mathbb{C}_v \xi_{zi} + \xi_{xi}$ . As a result, Case (b) is a special case of (S.14).

By the law of large numbers,  $\frac{1}{n} \sum_{i=1}^n \{(x_i x_i^\top) \otimes (\check{z}_i \check{z}_i^\top)\}$  converges to  $E \{(x_i x_i^\top) \otimes (\check{z}_i \check{z}_i^\top)\}$ . After algebraic simplification, we obtain that

$$\begin{aligned} E \{(x_i x_i^\top) \otimes (\check{z}_i \check{z}_i^\top)\} &= E \{(f_z(z_{0i}) f_z(z_{0i})^\top) \otimes (\check{z}_i \check{z}_i^\top)\} + E \{(f(z_{0i}) \xi_i^\top) \otimes (\check{z}_i \check{z}_i^\top)\} \\ &\quad + E \{(\xi_i f(z_{0i})^\top) \otimes (\check{z}_i \check{z}_i^\top)\} + E \{(\xi_i \xi_i^\top) \otimes (\check{z}_i \check{z}_i^\top)\} \\ &= E \{(f(z_{0i}) f(z_{0i})^\top) \otimes (\check{z}_i \check{z}_i^\top)\} + E \{(\xi_i \xi_i^\top) \otimes (\check{z}_i \check{z}_i^\top)\} \\ &= E \{(f(z_{0i}) f(z_{0i})^\top) \otimes (\check{z}_i \check{z}_i^\top)\} + \Sigma_\xi \otimes \tilde{\Sigma}, \end{aligned}$$

where

$$\tilde{\Sigma} = \begin{pmatrix} 1 & E(z_{0i}^\top) \\ E(z_{0i}) & E(z_{0i} z_{0i}^\top) \end{pmatrix}.$$

Since  $E \{(f(z_{0i}) f(z_{0i})^\top) \otimes (\check{z}_i \check{z}_i^\top)\}$  is positive semidefinite, the assumption that  $\Sigma_\xi$  and  $\tilde{\Sigma}$  are positive definite is sufficient to ensure the positive definiteness of  $E \{(x_i x_i^\top) \otimes (\check{z}_i \check{z}_i^\top)\}$ . As a result, this assumption is sufficient to ensure the first part of Condition (C3), which indicates that  $X$  cannot be fully explained by the latent vector  $Z_0$ .

## S.6 Heterophilic Networks

As suggested by an anonymous referee, the proposed model can be extended to accommodate heterophilic networks. Suppose that the network is generated via the following model

with indefinite inner products:

$$\text{logit}(P_{ij}) := \Theta_{ij} = \alpha_i + \alpha_j + z_i^\top I_{k_1, k_2} z_j, \quad (\text{S.15})$$

where  $\alpha_i$ ,  $\alpha_j$ ,  $z_i$ , and  $z_j$  are defined as those in equation (1) of the manuscript, and  $I_{k_1, k_2} = \text{diag}(I_{k_1}, -I_{k_2})$  for some constants  $k_1$  and  $k_2$  with  $k_1 + k_2 = k$ . Equation (S.15) is similar to the model of Rubin-Delanchy et al. (2022), although they considered  $P_{ij}$  rather than  $\text{logit}(P_{ij})$  in (S.15). This model indicates that the probability of nodes  $i$  and  $j$  being connected increases along with the similarity of the first  $k_1$  elements of  $z_i$  and  $z_j$  (i.e., the inner product of  $z_i$  and  $z_j$ ), and decreases along with the similarity of their last  $k_2$  elements.

We next adopt model (2) in the manuscript to construct the relationship between  $y_i$  and  $x_i$  as follows:

$$y_i = x_i^\top \beta_i + \epsilon_i = x_i^\top (Bz_i + \gamma) + \epsilon_i \quad (\text{S.16})$$

for  $i = 1, \dots, n$ , where  $z_i$  was defined in Model (S.15),  $B$  is a factor-loading matrix related to  $z_i$ ,  $\gamma$  is a coefficient vector that does not change with the “locations”, and  $\mathcal{T} = (\beta_1, \dots, \beta_n)^\top \in \mathbb{R}^{n \times p}$  is the regression coefficient matrix. To ensure identifiability of models (S.15) and (S.16), we assume that  $(I_n - J_n)Z = 0$ . Accordingly,  $Z$  is identifiable up to an indefinite orthogonal transformation. This means the probability matrix of the network remains the same if  $Z$  is replaced with  $ZM$ , where  $MI_{k_1, k_2}M^\top = I_{k_1, k_2}$  and  $M \in \mathbb{R}^{k \times k}$ . Since the column space of  $(\mathbf{1}_n, Z)$  and  $(\mathbf{1}_n, ZM)$  are the same, the indefinite orthogonal transformation does not affect the regression coefficient matrix. As a result, the pairs  $(Z, B)$  and  $(ZM, BM^{-1\top})$  yield identical probability and regression coefficient matrices. Consequently, the estimation procedure proposed in Section 2.3 is applicable for models (S.15) and (S.16). Please note that the  $i$ -th row of  $B$  and that of  $BM^{-1\top}$  are different under the  $l_2$  norm. Thus, the variable selection procedure proposed in the paper is not suitable for this model. Additional conditions are required to ensure the applicability of of variable selections. That needs further investigation.

As for the interpretation of coefficients, we note that the coefficient matrix  $\mathcal{T}$  depends on three components, i.e.,  $z_i$ s,  $B$  and  $\gamma$ . The latent variables  $z_i$ s can be viewed as the unobservable “location” of the nodes, and they affect the network connectivity in different ways. For example, the similarity of the first  $k_1$  variables promotes connections between the nodes, while the others deter them. In addition, the factor-loading matrix  $B$  characterizes the relationship between regression coefficients  $\beta_i$  and latent “locations”  $z_i$ s. If  $B \neq 0$ , the regression coefficients depend on latent “locations”. Note that the difference between  $\beta_{i_1j}$  and  $\beta_{i_2j}$  is  $|B_{j\cdot}(z_{i_1} - z_{i_2})|$ , where  $B_{j\cdot}^\top$  is the  $j$ -th row of  $B$ . If  $B_{j\cdot} = 0$ , there is no interaction between the network locations and the  $j$ -th covariate. Lastly,  $\gamma$  is a coefficient vector that does not change with latent “locations”, and it is a classical homogeneous regression coefficient vector when  $B = 0$ .

## S.7 Introduction of Two Competing Methods

The finite mixture model and network lasso method have been used for comparison in our simulation studies. This section presents a brief introduction of these two competing methods.

The finite mixture model (Leisch, 2004) assumes that the data consists of  $K$  groups

with homogeneous regression coefficients within each group. The density function of  $y_i$  given  $x_i$  is expressed as:

$$f(y_i|x_i) = \sum_{k=1}^K \pi_k N(x_i^\top \beta_k, \sigma_k^2), \quad (\text{S.17})$$

where  $\pi_k$  is the probability that  $y_i$  comes from the  $k$ -th group for  $k = 1, \dots, K$ , and  $\beta_k$  and  $\sigma_k^2$  are the regression coefficient vector and the error variance, respectively, for the  $k$ -th group. The parameters including  $\pi_k$ ,  $\beta_k$  and  $\sigma_k^2$  for  $k = 1, \dots, K$  in model (S.17) are estimated using the R package “flexmix”. The number of groups  $K$  is selected via the BIC-type criterion.

The network lasso method (Hallac et al., 2015) assumes that

$$y_i = x_i^\top \beta_i + \epsilon_i, \text{ for } i = 1, \dots, n, \quad (\text{S.18})$$

where  $\beta_i$  is the coefficient vector, and  $\epsilon_i$  is the random noise with mean 0 and variance  $\sigma^2$ . The coefficient matrix  $\beta = (\beta_1, \dots, \beta_n)^\top$  is estimated by

$$\hat{\beta} = \operatorname{argmin}_{\beta_i, i=1, \dots, n} \sum_{i=1}^n (y_i - x_i^\top \beta_i)^2 + \mu_l \sum_{i < j} a_{ij} \|\beta_i - \beta_j\|_2,$$

where  $\hat{\beta} = (\hat{\beta}_1, \dots, \hat{\beta}_n)^\top$ ,  $\mu_l$  is a tuning parameter and it can be chosen by the BIC criterion,  $\|\cdot\|_2$  is the  $\ell_2$  norm function, and  $a_{ij}$  is the  $(i, j)$ -th element in the adjacency matrix  $A$ . The alternating direction method of multipliers (ADMM) algorithm is employed to calculate  $\hat{\beta}$ .

## S.8 Additional Simulation Results

### S.8.1 Additional results based on the settings in Section 4

This subsection presents additional simulation results based on those settings described in Section 4. Tables S.1-S.2 present the results of Num $_k$  and CT when the random errors are normally distributed, where Num $_k$  is the value of  $\hat{k}$  selected by BIC in (6), and CT is the proportion of the true value of  $k$  being selected. These two tables indicate that all Num $_k$ s are equal to 2 and all CTs are 1. As a result, the BIC in (6) can consistently select the dimension of the latent space. Tables S.3-S.8 report the simulation results when the random errors are generated from a mixture normal distribution, while Tables S.9–S.14 report the simulation results when the random errors are simulated from the standardized exponential distribution. The results in Tables S.3-S.14 are qualitatively similar to those in Tables 1-4 and Tables S.1-S.2. This suggests that our method is robust against different types of error distributions.

Table S.1: The selection of latent space dimension under the low-dimensional setting with  $k = 2$  and standard normal random errors. The upper panel displays the means of the  $\text{Num}_k$ s along with the standard deviations in parentheses, while the lower panel displays CT.

|          |     | $B_{0,jl} \sim U(0.25, 0.5)$ |       |                          |       | $B_{0,jl} \sim U(0.5, 1)$ |       |                          |       |     |
|----------|-----|------------------------------|-------|--------------------------|-------|---------------------------|-------|--------------------------|-------|-----|
|          |     | $z_{0,ij} \sim N(0, 4)$      |       | $z_{0,ij} \sim U(-3, 3)$ |       | $z_{0,ij} \sim N(0, 4)$   |       | $z_{0,ij} \sim U(-3, 3)$ |       |     |
| $p$      | $n$ | NVCM                         | TNVC  | NVCM                     | TNVC  | NVCM                      | TNVC  | NVCM                     | TNVC  |     |
| Num $_k$ |     |                              |       |                          |       |                           |       |                          |       |     |
| 5        | 300 | 2.0                          | 2.0   | 2.0                      | 2.0   | 2.0                       | 2.0   | 2.0                      | 2.0   |     |
|          |     | (0.0)                        | (0.0) | (0.0)                    | (0.0) | (0.0)                     | (0.0) | (0.0)                    | (0.0) |     |
|          | 500 | 2.0                          | 2.0   | 2.0                      | 2.0   | 2.0                       | 2.0   | 2.0                      | 2.0   |     |
|          |     | (0.0)                        | (0.0) | (0.0)                    | (0.0) | (0.0)                     | (0.0) | (0.0)                    | (0.0) |     |
|          | 800 | 2.0                          | 2.0   | 2.0                      | 2.0   | 2.0                       | 2.0   | 2.0                      | 2.0   |     |
|          |     | (0.0)                        | (0.0) | (0.0)                    | (0.0) | (0.0)                     | (0.0) | (0.0)                    | (0.0) |     |
| 10       | 300 | 2.0                          | 2.0   | 2.0                      | 2.0   | 2.0                       | 2.0   | 2.0                      | 2.0   |     |
|          |     | (0.0)                        | (0.0) | (0.0)                    | (0.0) | (0.0)                     | (0.0) | (0.0)                    | (0.0) |     |
|          | 500 | 2.0                          | 2.0   | 2.0                      | 2.0   | 2.0                       | 2.0   | 2.0                      | 2.0   |     |
|          |     | (0.0)                        | (0.0) | (0.0)                    | (0.0) | (0.0)                     | (0.0) | (0.0)                    | (0.0) |     |
|          | CT  |                              |       |                          |       |                           |       |                          |       |     |
|          | 5   | 300                          | 1.0   | 1.0                      | 1.0   | 1.0                       | 1.0   | 1.0                      | 1.0   | 1.0 |
| 500      |     | 1.0                          | 1.0   | 1.0                      | 1.0   | 1.0                       | 1.0   | 1.0                      | 1.0   |     |
| 800      |     | 1.0                          | 1.0   | 1.0                      | 1.0   | 1.0                       | 1.0   | 1.0                      | 1.0   |     |
| 10       | 300 | 1.0                          | 1.0   | 1.0                      | 1.0   | 1.0                       | 1.0   | 1.0                      | 1.0   |     |
|          | 500 | 1.0                          | 1.0   | 1.0                      | 1.0   | 1.0                       | 1.0   | 1.0                      | 1.0   |     |
|          | 800 | 1.0                          | 1.0   | 1.0                      | 1.0   | 1.0                       | 1.0   | 1.0                      | 1.0   |     |

Table S.2: The selection of latent space dimension under the high-dimensional setting with  $k = 2$  and standard normal random errors. The upper panel displays the means of the  $\text{Num}_k$ s along with the standard deviations in parentheses, while the lower panel displays CT.

| $n$              | $p = 50$                |       |                          |       | $p = 100$               |       |                          |       |
|------------------|-------------------------|-------|--------------------------|-------|-------------------------|-------|--------------------------|-------|
|                  | $z_{0,ij} \sim N(0, 4)$ |       | $z_{0,ij} \sim U(-3, 3)$ |       | $z_{0,ij} \sim N(0, 4)$ |       | $z_{0,ij} \sim U(-3, 3)$ |       |
|                  | SNVC                    | TSNVC | SNVC                     | TSNVC | SNVC                    | TSNVC | SNVC                     | TSNVC |
| Num <sub>k</sub> |                         |       |                          |       |                         |       |                          |       |
| 500              | 2.0                     | 2.0   | 2.0                      | 2.0   | 2.0                     | 2.0   | 2.0                      | 2.0   |
|                  | (0.0)                   | (0.0) | (0.0)                    | (0.0) | (0.0)                   | (0.0) | (0.0)                    | (0.0) |
| 800              | 2.0                     | 2.0   | 2.0                      | 2.0   | 2.0                     | 2.0   | 2.0                      | 2.0   |
|                  | (0.0)                   | (0.0) | (0.0)                    | (0.0) | (0.0)                   | (0.0) | (0.0)                    | (0.0) |
| CT               |                         |       |                          |       |                         |       |                          |       |
| 500              | 1.0                     | 1.0   | 1.0                      | 1.0   | 1.0                     | 1.0   | 1.0                      | 1.0   |
| 800              | 1.0                     | 1.0   | 1.0                      | 1.0   | 1.0                     | 1.0   | 1.0                      | 1.0   |

Table S.3: The means of the  $ME_{\mathcal{T}}$ s along with the standard deviations in parentheses, which are obtained under the low-dimensional setting with  $k = 2$  and mixture normal random errors.

| $p$                          | $n$ | NVCM    | TNVC    | NLM     | FMM     | CLR                       | NVCM    | TNVC    | NLM     | FMM     | CLR     |
|------------------------------|-----|---------|---------|---------|---------|---------------------------|---------|---------|---------|---------|---------|
| $B_{0,jl} \sim U(0.25, 0.5)$ |     |         |         |         |         | $B_{0,jl} \sim U(0.5, 1)$ |         |         |         |         |         |
| $z_{0,ij} \sim N(0, 4)$      |     |         |         |         |         |                           |         |         |         |         |         |
| 5                            | 300 | 0.040   | 0.052   | 0.867   | 0.575   | 0.879                     | 0.025   | 0.050   | 1.022   | 0.525   | 1.004   |
|                              |     | (0.010) | (0.010) | (0.040) | (0.377) | (0.039)                   | (0.005) | (0.007) | (0.035) | (0.192) | (0.036) |
|                              | 500 | 0.033   | 0.044   | 0.849   | 0.478   | 0.870                     | 0.022   | 0.044   | 0.995   | 0.475   | 0.990   |
|                              |     | (0.005) | (0.005) | (0.023) | (0.113) | (0.022)                   | (0.004) | (0.004) | (0.020) | (0.180) | (0.026) |
|                              | 800 | 0.023   | 0.027   | 0.824   | 0.380   | 0.844                     | 0.018   | 0.028   | 0.955   | 0.344   | 0.973   |
|                              |     | (0.003) | (0.003) | (0.013) | (0.044) | (0.013)                   | (0.002) | (0.002) | (0.016) | (0.049) | (0.015) |
| 10                           | 300 | 0.042   | 0.065   | 0.908   | 1.011   | 0.924                     | 0.028   | 0.063   | 1.098   | 1.045   | 1.085   |
|                              |     | (0.009) | (0.011) | (0.060) | (0.620) | (0.065)                   | (0.005) | (0.011) | (0.063) | (0.773) | (0.068) |
|                              | 500 | 0.032   | 0.050   | 0.859   | 0.658   | 0.885                     | 0.020   | 0.053   | 1.032   | 0.729   | 1.031   |
|                              |     | (0.006) | (0.007) | (0.040) | (0.376) | (0.040)                   | (0.004) | (0.005) | (0.038) | (0.356) | (0.047) |
|                              | 800 | 0.022   | 0.030   | 0.845   | 0.435   | 0.867                     | 0.015   | 0.032   | 0.978   | 0.459   | 1.002   |
|                              |     | (0.003) | (0.003) | (0.022) | (0.084) | (0.022)                   | (0.002) | (0.003) | (0.025) | (0.090) | (0.025) |
| $z_{0,ij} \sim U(-3, 3)$     |     |         |         |         |         |                           |         |         |         |         |         |
| 5                            | 300 | 0.027   | 0.030   | 0.823   | 0.483   | 0.840                     | 0.018   | 0.024   | 1.017   | 0.449   | 0.997   |
|                              |     | (0.009) | (0.009) | (0.043) | (0.153) | (0.030)                   | (0.004) | (0.004) | (0.043) | (0.086) | (0.048) |
|                              | 500 | 0.017   | 0.020   | 0.788   | 0.413   | 0.826                     | 0.011   | 0.016   | 0.953   | 0.353   | 0.974   |
|                              |     | (0.005) | (0.005) | (0.019) | (0.071) | (0.018)                   | (0.002) | (0.002) | (0.031) | (0.048) | (0.026) |
|                              | 800 | 0.012   | 0.013   | 0.786   | 0.366   | 0.812                     | 0.008   | 0.011   | 0.931   | 0.307   | 0.961   |
|                              |     | (0.003) | (0.003) | (0.016) | (0.048) | (0.017)                   | (0.001) | (0.001) | (0.017) | (0.042) | (0.017) |
| 10                           | 300 | 0.032   | 0.036   | 0.869   | 0.712   | 0.885                     | 0.019   | 0.028   | 1.098   | 0.900   | 1.080   |
|                              |     | (0.007) | (0.008) | (0.057) | (0.301) | (0.056)                   | (0.004) | (0.005) | (0.075) | (0.810) | (0.084) |
|                              | 500 | 0.018   | 0.023   | 0.811   | 0.457   | 0.854                     | 0.011   | 0.018   | 0.980   | 0.485   | 1.018   |
|                              |     | (0.004) | (0.003) | (0.035) | (0.095) | (0.035)                   | (0.002) | (0.002) | (0.038) | (0.182) | (0.044) |
|                              | 800 | 0.012   | 0.015   | 0.796   | 0.376   | 0.825                     | 0.008   | 0.013   | 0.946   | 0.375   | 0.981   |
|                              |     | (0.002) | (0.002) | (0.022) | (0.064) | (0.022)                   | (0.001) | (0.001) | (0.023) | (0.052) | (0.023) |

Table S.4: The means of the  $ME_\gamma$ s and the  $ME_B$ s along with the standard deviations in parentheses, which are obtained under the low-dimensional setting with  $k = 2$  and mixture normal random errors.

| $p$                      | $n$ | NVCM                         | TNVC    | NVCM    | TNVC    | NVCM                      | TNVC    | NVCM    | TNVC    |
|--------------------------|-----|------------------------------|---------|---------|---------|---------------------------|---------|---------|---------|
|                          |     | $ME_\gamma$                  |         | $ME_B$  |         | $ME_\gamma$               |         | $ME_B$  |         |
|                          |     | $B_{0,jl} \sim U(0.25, 0.5)$ |         |         |         | $B_{0,jl} \sim U(0.5, 1)$ |         |         |         |
| $z_{0,ij} \sim N(0, 4)$  |     |                              |         |         |         |                           |         |         |         |
| 5                        | 300 | 0.026                        | 0.030   | 0.037   | 0.038   | 0.032                     | 0.065   | 0.023   | 0.029   |
|                          |     | (0.021)                      | (0.022) | (0.013) | (0.016) | (0.028)                   | (0.049) | (0.006) | (0.010) |
|                          | 500 | 0.018                        | 0.021   | 0.032   | 0.037   | 0.022                     | 0.042   | 0.021   | 0.032   |
|                          |     | (0.012)                      | (0.014) | (0.008) | (0.012) | (0.019)                   | (0.031) | (0.004) | (0.009) |
|                          | 800 | 0.010                        | 0.011   | 0.023   | 0.025   | 0.013                     | 0.019   | 0.017   | 0.021   |
|                          |     | (0.007)                      | (0.007) | (0.006) | (0.007) | (0.011)                   | (0.016) | (0.003) | (0.005) |
| 10                       | 300 | 0.036                        | 0.053   | 0.040   | 0.052   | 0.051                     | 0.110   | 0.038   | 0.044   |
|                          |     | (0.022)                      | (0.030) | (0.010) | (0.016) | (0.027)                   | (0.054) | (0.013) | (0.017) |
|                          | 500 | 0.019                        | 0.026   | 0.034   | 0.046   | 0.031                     | 0.083   | 0.019   | 0.039   |
|                          |     | (0.012)                      | (0.014) | (0.009) | (0.014) | (0.020)                   | (0.045) | (0.004) | (0.011) |
|                          | 800 | 0.010                        | 0.013   | 0.022   | 0.027   | 0.016                     | 0.036   | 0.015   | 0.026   |
|                          |     | (0.006)                      | (0.007) | (0.004) | (0.006) | (0.009)                   | (0.022) | (0.002) | (0.005) |
| $z_{0,ij} \sim U(-3, 3)$ |     |                              |         |         |         |                           |         |         |         |
| 5                        | 300 | 0.024                        | 0.025   | 0.017   | 0.016   | 0.030                     | 0.036   | 0.010   | 0.008   |
|                          |     | (0.021)                      | (0.021) | (0.010) | (0.010) | (0.023)                   | (0.027) | (0.005) | (0.004) |
|                          | 500 | 0.013                        | 0.013   | 0.014   | 0.014   | 0.016                     | 0.019   | 0.007   | 0.008   |
|                          |     | (0.010)                      | (0.010) | (0.007) | (0.007) | (0.013)                   | (0.015) | (0.002) | (0.003) |
|                          | 800 | 0.008                        | 0.008   | 0.009   | 0.009   | 0.010                     | 0.012   | 0.005   | 0.006   |
|                          |     | (0.007)                      | (0.007) | (0.003) | (0.003) | (0.008)                   | (0.009) | (0.001) | (0.002) |
| 10                       | 300 | 0.031                        | 0.035   | 0.023   | 0.022   | 0.041                     | 0.059   | 0.020   | 0.011   |
|                          |     | (0.017)                      | (0.018) | (0.008) | (0.008) | (0.023)                   | (0.030) | (0.007) | (0.004) |
|                          | 500 | 0.015                        | 0.017   | 0.016   | 0.018   | 0.019                     | 0.030   | 0.010   | 0.010   |
|                          |     | (0.008)                      | (0.009) | (0.005) | (0.005) | (0.011)                   | (0.016) | (0.004) | (0.003) |
|                          | 800 | 0.009                        | 0.010   | 0.010   | 0.011   | 0.012                     | 0.016   | 0.005   | 0.007   |
|                          |     | (0.004)                      | (0.005) | (0.003) | (0.003) | (0.006)                   | (0.009) | (0.001) | (0.002) |

Table S.5: The means of the  $ME_{\mathcal{T}}$ s along with the standard deviations in parentheses, which are obtained under the high-dimensional setting with  $k = 2$  and mixture normal random errors.

| $p$ | $n$ | SNVC                    | TSNVC   | NVCM    | TNVC    | SNVC                     | TSNVC   | NVCM    | TNVC    |
|-----|-----|-------------------------|---------|---------|---------|--------------------------|---------|---------|---------|
|     |     | $z_{0,ij} \sim N(0, 4)$ |         |         |         | $z_{0,ij} \sim U(-3, 3)$ |         |         |         |
| 50  | 500 | 0.052                   | 0.100   | 0.113   | 0.176   | 0.028                    | 0.033   | 0.116   | 0.122   |
|     |     | (0.014)                 | (0.021) | (0.015) | (0.033) | (0.011)                  | (0.012) | (0.025) | (0.025) |
|     | 800 | 0.036                   | 0.049   | 0.084   | 0.107   | 0.016                    | 0.018   | 0.059   | 0.062   |
|     |     | (0.006)                 | (0.010) | (0.011) | (0.016) | (0.004)                  | (0.004) | (0.010) | (0.010) |
| 100 | 500 | 0.060                   | 0.111   | 0.389   | 0.507   | 0.029                    | 0.036   | 0.431   | 0.389   |
|     |     | (0.018)                 | (0.029) | (0.058) | (0.083) | (0.015)                  | (0.016) | (0.074) | (0.066) |
|     | 800 | 0.037                   | 0.051   | 0.183   | 0.225   | 0.014                    | 0.017   | 0.126   | 0.133   |
|     |     | (0.007)                 | (0.012) | (0.021) | (0.028) | (0.003)                  | (0.004) | (0.016) | (0.016) |



Table S.6: The means of the four model selection measures ( $\text{TPR}_B$ ,  $\text{TPR}_\gamma$ ,  $\text{FDR}_B$  and  $\text{FDR}_\gamma$ ) along with the standard deviations in parentheses, which are obtained under the high-dimensional setting with mixture normal random errors.

| $p$                      | $n$ | $\text{TPR}_B$ |         | $\text{TPR}_\gamma$ |         | $\text{FDR}_B$ |         | $\text{FDR}_\gamma$ |         |
|--------------------------|-----|----------------|---------|---------------------|---------|----------------|---------|---------------------|---------|
|                          |     | SNVC           | TSNVC   | SNVC                | TSNVC   | SNVC           | TSNVC   | SNVC                | TSNVC   |
| $z_{0,ij} \sim N(0, 4)$  |     |                |         |                     |         |                |         |                     |         |
| 50                       | 500 | 1.000          | 1.000   | 0.936               | 0.769   | 0.102          | 0.094   | 0.022               | 0.029   |
|                          |     | (0.000)        | (0.000) | (0.094)             | (0.145) | (0.099)        | (0.111) | (0.046)             | (0.056) |
|                          | 800 | 1.000          | 1.000   | 0.997               | 0.985   | 0.043          | 0.075   | 0.006               | 0.010   |
|                          |     | (0.000)        | (0.000) | (0.017)             | (0.044) | (0.060)        | (0.081) | (0.024)             | (0.029) |
| 100                      | 500 | 1.000          | 0.999   | 0.919               | 0.767   | 0.114          | 0.130   | 0.023               | 0.033   |
|                          |     | (0.000)        | (0.010) | (0.106)             | (0.142) | (0.113)        | (0.130) | (0.049)             | (0.063) |
|                          | 800 | 1.000          | 1.000   | 0.995               | 0.986   | 0.065          | 0.114   | 0.007               | 0.017   |
|                          |     | (0.000)        | (0.000) | (0.022)             | (0.045) | (0.079)        | (0.110) | (0.027)             | (0.041) |
| $z_{0,ij} \sim U(-3, 3)$ |     |                |         |                     |         |                |         |                     |         |
| 50                       | 500 | 1.000          | 1.000   | 0.988               | 0.984   | 0.035          | 0.060   | 0.013               | 0.021   |
|                          |     | (0.000)        | (0.000) | (0.038)             | (0.042) | (0.055)        | (0.072) | (0.034)             | (0.043) |
|                          | 800 | 1.000          | 1.000   | 0.999               | 1.000   | 0.005          | 0.020   | 0.003               | 0.006   |
|                          |     | (0.000)        | (0.000) | (0.010)             | (0.000) | (0.022)        | (0.042) | (0.021)             | (0.023) |
| 100                      | 500 | 1.000          | 1.000   | 0.980               | 0.970   | 0.045          | 0.075   | 0.022               | 0.035   |
|                          |     | (0.000)        | (0.000) | (0.055)             | (0.064) | (0.071)        | (0.086) | (0.046)             | (0.057) |
|                          | 800 | 1.000          | 1.000   | 1.000               | 0.999   | 0.012          | 0.025   | 0.003               | 0.008   |
|                          |     | (0.000)        | (0.000) | (0.000)             | (0.010) | (0.031)        | (0.049) | (0.021)             | (0.026) |

Table S.7: The selection of latent space dimension under the low-dimensional setting with  $k = 2$  and mixture normal random errors. The upper panel displays the means of the  $\text{Num}_k$ s along with the standard deviations in parentheses, while the lower panel displays CT.

|                  |     | $B_{0,jl} \sim U(0.25, 0.5)$ |       |                          |       | $B_{0,jl} \sim U(0.5, 1)$ |       |                          |       |     |
|------------------|-----|------------------------------|-------|--------------------------|-------|---------------------------|-------|--------------------------|-------|-----|
|                  |     | $z_{0,ij} \sim N(0, 4)$      |       | $z_{0,ij} \sim U(-3, 3)$ |       | $z_{0,ij} \sim N(0, 4)$   |       | $z_{0,ij} \sim U(-3, 3)$ |       |     |
| $p$              | $n$ | NVCM                         | TNVC  | NVCM                     | TNVC  | NVCM                      | TNVC  | NVCM                     | TNVC  |     |
| Num <sub>k</sub> |     |                              |       |                          |       |                           |       |                          |       |     |
| 5                | 300 | 2.0                          | 2.0   | 2.0                      | 2.0   | 2.0                       | 2.0   | 2.0                      | 2.0   |     |
|                  |     | (0.0)                        | (0.0) | (0.0)                    | (0.0) | (0.0)                     | (0.0) | (0.0)                    | (0.0) |     |
|                  | 500 | 2.0                          | 2.0   | 2.0                      | 2.0   | 2.0                       | 2.0   | 2.0                      | 2.0   |     |
|                  |     | (0.0)                        | (0.0) | (0.0)                    | (0.0) | (0.0)                     | (0.0) | (0.0)                    | (0.0) |     |
|                  | 800 | 2.0                          | 2.0   | 2.0                      | 2.0   | 2.0                       | 2.0   | 2.0                      | 2.0   |     |
|                  |     | (0.0)                        | (0.0) | (0.0)                    | (0.0) | (0.0)                     | (0.0) | (0.0)                    | (0.0) |     |
| 10               | 300 | 2.0                          | 2.0   | 2.0                      | 2.0   | 2.0                       | 2.0   | 2.0                      | 2.0   |     |
|                  |     | (0.0)                        | (0.0) | (0.0)                    | (0.0) | (0.0)                     | (0.0) | (0.0)                    | (0.0) |     |
|                  | 500 | 2.0                          | 2.0   | 2.0                      | 2.0   | 2.0                       | 2.0   | 2.0                      | 2.0   |     |
|                  |     | (0.0)                        | (0.0) | (0.0)                    | (0.0) | (0.0)                     | (0.0) | (0.0)                    | (0.0) |     |
|                  | CT  |                              |       |                          |       |                           |       |                          |       |     |
|                  | 5   | 300                          | 1.0   | 1.0                      | 1.0   | 1.0                       | 1.0   | 1.0                      | 1.0   | 1.0 |
| 500              |     | 1.0                          | 1.0   | 1.0                      | 1.0   | 1.0                       | 1.0   | 1.0                      | 1.0   |     |
| 800              |     | 1.0                          | 1.0   | 1.0                      | 1.0   | 1.0                       | 1.0   | 1.0                      | 1.0   |     |
| 10               | 300 | 1.0                          | 1.0   | 1.0                      | 1.0   | 1.0                       | 1.0   | 1.0                      | 1.0   |     |
|                  | 500 | 1.0                          | 1.0   | 1.0                      | 1.0   | 1.0                       | 1.0   | 1.0                      | 1.0   |     |
|                  | 800 | 1.0                          | 1.0   | 1.0                      | 1.0   | 1.0                       | 1.0   | 1.0                      | 1.0   |     |

Table S.8: The selection of latent space dimension under the high-dimensional setting with  $k = 2$  and mixture normal random errors. The upper panel displays the means of the  $\text{Num}_k$ s along with the standard deviations in parentheses, while the lower panel displays CT.

| $n$              | $p = 50$                |       |                          |       | $p = 100$               |       |                          |       |
|------------------|-------------------------|-------|--------------------------|-------|-------------------------|-------|--------------------------|-------|
|                  | $z_{0,ij} \sim N(0, 4)$ |       | $z_{0,ij} \sim U(-3, 3)$ |       | $z_{0,ij} \sim N(0, 4)$ |       | $z_{0,ij} \sim U(-3, 3)$ |       |
|                  | SNVC                    | TSNVC | SNVC                     | TSNVC | SNVC                    | TSNVC | SNVC                     | TSNVC |
| Num <sub>k</sub> |                         |       |                          |       |                         |       |                          |       |
| 500              | 2.0                     | 2.0   | 2.0                      | 2.0   | 2.0                     | 2.0   | 2.0                      | 2.0   |
|                  | (0.0)                   | (0.0) | (0.0)                    | (0.0) | (0.0)                   | (0.0) | (0.0)                    | (0.0) |
| 800              | 2.0                     | 2.0   | 2.0                      | 2.0   | 2.0                     | 2.0   | 2.0                      | 2.0   |
|                  | (0.0)                   | (0.0) | (0.0)                    | (0.0) | (0.0)                   | (0.0) | (0.0)                    | (0.0) |
| CT               |                         |       |                          |       |                         |       |                          |       |
| 500              | 1.0                     | 1.0   | 1.0                      | 1.0   | 1.0                     | 1.0   | 1.0                      | 1.0   |
| 800              | 1.0                     | 1.0   | 1.0                      | 1.0   | 1.0                     | 1.0   | 1.0                      | 1.0   |

Table S.9: The means of the  $ME_{\mathcal{T}S}$  along with the standard deviations in parentheses, which are obtained under the low-dimensional setting with  $k = 2$  and standardized exponential random errors.

| $p$                          | $n$ | NVCM             | TNVC             | NLM              | FMM              | CLR                       | NVCM             | TNVC             | NLM              | FMM              | CLR              |
|------------------------------|-----|------------------|------------------|------------------|------------------|---------------------------|------------------|------------------|------------------|------------------|------------------|
| $B_{0,jl} \sim U(0.25, 0.5)$ |     |                  |                  |                  |                  | $B_{0,jl} \sim U(0.5, 1)$ |                  |                  |                  |                  |                  |
| $z_{0,ij} \sim N(0, 4)$      |     |                  |                  |                  |                  |                           |                  |                  |                  |                  |                  |
| 5                            | 300 | 0.040<br>(0.008) | 0.052<br>(0.009) | 0.864<br>(0.042) | 0.538<br>(0.150) | 0.877<br>(0.037)          | 0.025<br>(0.004) | 0.051<br>(0.006) | 1.022<br>(0.037) | 0.529<br>(0.183) | 1.005<br>(0.038) |
|                              | 500 | 0.032<br>(0.004) | 0.043<br>(0.005) | 0.847<br>(0.021) | 0.493<br>(0.139) | 0.869<br>(0.021)          | 0.022<br>(0.002) | 0.044<br>(0.004) | 0.994<br>(0.019) | 0.482<br>(0.153) | 0.990<br>(0.025) |
|                              | 800 | 0.023<br>(0.002) | 0.027<br>(0.003) | 0.824<br>(0.012) | 0.388<br>(0.043) | 0.843<br>(0.013)          | 0.018<br>(0.001) | 0.028<br>(0.002) | 0.955<br>(0.016) | 0.345<br>(0.041) | 0.972<br>(0.015) |
| 10                           | 300 | 0.045<br>(0.009) | 0.067<br>(0.012) | 0.912<br>(0.062) | 0.975<br>(0.556) | 0.926<br>(0.067)          | 0.028<br>(0.006) | 0.064<br>(0.010) | 1.098<br>(0.063) | 1.334<br>(1.023) | 1.083<br>(0.067) |
|                              | 500 | 0.033<br>(0.005) | 0.051<br>(0.007) | 0.859<br>(0.039) | 0.647<br>(0.270) | 0.885<br>(0.039)          | 0.020<br>(0.003) | 0.052<br>(0.005) | 1.033<br>(0.037) | 0.683<br>(0.248) | 1.030<br>(0.046) |
|                              | 800 | 0.023<br>(0.003) | 0.030<br>(0.003) | 0.844<br>(0.022) | 0.447<br>(0.093) | 0.866<br>(0.022)          | 0.015<br>(0.001) | 0.032<br>(0.003) | 0.978<br>(0.025) | 0.454<br>(0.083) | 1.002<br>(0.025) |
| $z_{0,ij} \sim U(-3, 3)$     |     |                  |                  |                  |                  |                           |                  |                  |                  |                  |                  |
| 5                            | 300 | 0.028<br>(0.007) | 0.030<br>(0.007) | 0.827<br>(0.044) | 0.475<br>(0.096) | 0.845<br>(0.036)          | 0.017<br>(0.003) | 0.023<br>(0.004) | 1.016<br>(0.044) | 0.455<br>(0.142) | 0.996<br>(0.047) |
|                              | 500 | 0.018<br>(0.004) | 0.020<br>(0.004) | 0.788<br>(0.018) | 0.412<br>(0.064) | 0.826<br>(0.017)          | 0.011<br>(0.001) | 0.016<br>(0.002) | 0.951<br>(0.032) | 0.347<br>(0.042) | 0.974<br>(0.026) |
|                              | 800 | 0.012<br>(0.002) | 0.013<br>(0.002) | 0.786<br>(0.017) | 0.365<br>(0.030) | 0.812<br>(0.017)          | 0.008<br>(0.001) | 0.011<br>(0.001) | 0.931<br>(0.019) | 0.306<br>(0.034) | 0.961<br>(0.018) |
| 10                           | 300 | 0.032<br>(0.007) | 0.036<br>(0.008) | 0.867<br>(0.056) | 0.748<br>(0.571) | 0.883<br>(0.053)          | 0.020<br>(0.003) | 0.029<br>(0.005) | 1.099<br>(0.078) | 0.882<br>(1.030) | 1.082<br>(0.088) |
|                              | 500 | 0.019<br>(0.004) | 0.022<br>(0.004) | 0.810<br>(0.032) | 0.477<br>(0.143) | 0.854<br>(0.032)          | 0.011<br>(0.002) | 0.019<br>(0.002) | 0.980<br>(0.036) | 0.506<br>(0.208) | 1.017<br>(0.043) |
|                              | 800 | 0.013<br>(0.002) | 0.015<br>(0.002) | 0.796<br>(0.023) | 0.384<br>(0.088) | 0.825<br>(0.022)          | 0.008<br>(0.001) | 0.013<br>(0.001) | 0.946<br>(0.023) | 0.379<br>(0.051) | 0.981<br>(0.023) |

Table S.10: The means of the  $ME_\gamma$ s and the  $ME_B$ s along with the standard deviations in parentheses, which are obtained under the low-dimensional setting with  $k = 2$  and standardized exponential random errors.

| $p$                      | $n$ | NVCM<br>$ME_\gamma$<br>$B_{0,jl} \sim U(0.25, 0.5)$ | TNVC<br>$ME_B$   | NVCM<br>$ME_\gamma$<br>$B_{0,jl} \sim U(0.5, 1)$ | TNVC<br>$ME_B$   | NVCM<br>$ME_\gamma$<br>$B_{0,jl} \sim U(0.5, 1)$ | TNVC<br>$ME_B$   | NVCM<br>$ME_\gamma$<br>$B_{0,jl} \sim U(0.5, 1)$ | TNVC<br>$ME_B$   |
|--------------------------|-----|-----------------------------------------------------|------------------|--------------------------------------------------|------------------|--------------------------------------------------|------------------|--------------------------------------------------|------------------|
| $z_{0,ij} \sim N(0, 4)$  |     |                                                     |                  |                                                  |                  |                                                  |                  |                                                  |                  |
| 5                        | 300 | 0.029<br>(0.021)                                    | 0.033<br>(0.023) | 0.037<br>(0.013)                                 | 0.038<br>(0.014) | 0.035<br>(0.024)                                 | 0.067<br>(0.047) | 0.023<br>(0.006)                                 | 0.029<br>(0.011) |
|                          | 500 | 0.016<br>(0.012)                                    | 0.020<br>(0.014) | 0.032<br>(0.007)                                 | 0.037<br>(0.012) | 0.020<br>(0.013)                                 | 0.041<br>(0.027) | 0.021<br>(0.004)                                 | 0.032<br>(0.009) |
|                          | 800 | 0.008<br>(0.006)                                    | 0.009<br>(0.007) | 0.023<br>(0.006)                                 | 0.025<br>(0.007) | 0.012<br>(0.008)                                 | 0.017<br>(0.013) | 0.016<br>(0.003)                                 | 0.021<br>(0.005) |
| 10                       | 300 | 0.038<br>(0.021)                                    | 0.053<br>(0.030) | 0.045<br>(0.013)                                 | 0.056<br>(0.018) | 0.055<br>(0.033)                                 | 0.120<br>(0.055) | 0.036<br>(0.013)                                 | 0.044<br>(0.016) |
|                          | 500 | 0.019<br>(0.009)                                    | 0.026<br>(0.013) | 0.034<br>(0.007)                                 | 0.047<br>(0.015) | 0.028<br>(0.017)                                 | 0.075<br>(0.042) | 0.019<br>(0.003)                                 | 0.039<br>(0.011) |
|                          | 800 | 0.012<br>(0.007)                                    | 0.015<br>(0.009) | 0.023<br>(0.004)                                 | 0.027<br>(0.006) | 0.017<br>(0.008)                                 | 0.034<br>(0.020) | 0.015<br>(0.002)                                 | 0.025<br>(0.006) |
| $z_{0,ij} \sim U(-3, 3)$ |     |                                                     |                  |                                                  |                  |                                                  |                  |                                                  |                  |
| 5                        | 300 | 0.024<br>(0.016)                                    | 0.026<br>(0.017) | 0.018<br>(0.008)                                 | 0.017<br>(0.008) | 0.030<br>(0.022)                                 | 0.036<br>(0.028) | 0.010<br>(0.005)                                 | 0.007<br>(0.004) |
|                          | 500 | 0.013<br>(0.010)                                    | 0.013<br>(0.011) | 0.014<br>(0.005)                                 | 0.014<br>(0.005) | 0.015<br>(0.009)                                 | 0.017<br>(0.011) | 0.007<br>(0.002)                                 | 0.009<br>(0.003) |
|                          | 800 | 0.009<br>(0.006)                                    | 0.009<br>(0.006) | 0.009<br>(0.003)                                 | 0.009<br>(0.003) | 0.010<br>(0.007)                                 | 0.011<br>(0.009) | 0.005<br>(0.001)                                 | 0.006<br>(0.002) |
| 10                       | 300 | 0.029<br>(0.016)                                    | 0.034<br>(0.019) | 0.024<br>(0.008)                                 | 0.023<br>(0.009) | 0.045<br>(0.023)                                 | 0.068<br>(0.034) | 0.020<br>(0.008)                                 | 0.012<br>(0.005) |
|                          | 500 | 0.015<br>(0.010)                                    | 0.016<br>(0.011) | 0.016<br>(0.005)                                 | 0.018<br>(0.005) | 0.020<br>(0.010)                                 | 0.030<br>(0.015) | 0.009<br>(0.003)                                 | 0.010<br>(0.003) |
|                          | 800 | 0.010<br>(0.007)                                    | 0.011<br>(0.007) | 0.010<br>(0.002)                                 | 0.011<br>(0.003) | 0.011<br>(0.006)                                 | 0.015<br>(0.008) | 0.005<br>(0.001)                                 | 0.007<br>(0.002) |

Table S.11: The means of the  $ME_\tau$ s along with the standard deviations in parentheses, which are obtained under the high-dimensional setting with  $k = 2$  and standardized exponential random errors.

| $p$                     | $n$ | SNVC             | TSNVC            | NVCM             | TNVC                     | SNVC             | TSNVC            | NVCM             | TNVC             |
|-------------------------|-----|------------------|------------------|------------------|--------------------------|------------------|------------------|------------------|------------------|
| $z_{0,ij} \sim N(0, 4)$ |     |                  |                  |                  | $z_{0,ij} \sim U(-3, 3)$ |                  |                  |                  |                  |
| 50                      | 500 | 0.044<br>(0.015) | 0.076<br>(0.022) | 0.120<br>(0.017) | 0.162<br>(0.022)         | 0.025<br>(0.007) | 0.033<br>(0.011) | 0.104<br>(0.020) | 0.113<br>(0.019) |
|                         | 800 | 0.029<br>(0.004) | 0.039<br>(0.008) | 0.074<br>(0.010) | 0.093<br>(0.013)         | 0.014<br>(0.002) | 0.016<br>(0.002) | 0.052<br>(0.007) | 0.056<br>(0.007) |
| 100                     | 500 | 0.049<br>(0.016) | 0.091<br>(0.026) | 0.398<br>(0.066) | 0.479<br>(0.067)         | 0.031<br>(0.016) | 0.040<br>(0.017) | 0.444<br>(0.077) | 0.406<br>(0.070) |
|                         | 800 | 0.030<br>(0.006) | 0.041<br>(0.010) | 0.168<br>(0.022) | 0.201<br>(0.028)         | 0.015<br>(0.003) | 0.017<br>(0.004) | 0.137<br>(0.016) | 0.141<br>(0.016) |

Table S.12: The means of the four model selection measures ( $\text{TPR}_B$ ,  $\text{TPR}_\gamma$ ,  $\text{FDR}_B$  and  $\text{FDR}_\gamma$ ) along with the standard deviations in parentheses, which are obtained under the high-dimensional setting with standardized exponential random errors.

| $p$                      | $n$ | $\text{TPR}_B$ |         | $\text{TPR}_\gamma$ |         | $\text{FDR}_B$ |         | $\text{FDR}_\gamma$ |         |
|--------------------------|-----|----------------|---------|---------------------|---------|----------------|---------|---------------------|---------|
|                          |     | SNVC           | TSNVC   | SNVC                | TSNVC   | SNVC           | TSNVC   | SNVC                | TSNVC   |
| $z_{0,ij} \sim N(0, 4)$  |     |                |         |                     |         |                |         |                     |         |
| 50                       | 500 | 1.000          | 1.000   | 0.964               | 0.882   | 0.073          | 0.090   | 0.020               | 0.021   |
|                          |     | (0.000)        | (0.000) | (0.075)             | (0.115) | (0.085)        | (0.094) | (0.044)             | (0.050) |
|                          | 800 | 1.000          | 1.000   | 1.000               | 0.994   | 0.029          | 0.054   | 0.009               | 0.013   |
|                          |     | (0.000)        | (0.000) | (0.000)             | (0.024) | (0.059)        | (0.075) | (0.029)             | (0.034) |
| 100                      | 500 | 1.000          | 1.000   | 0.924               | 0.788   | 0.094          | 0.104   | 0.026               | 0.028   |
|                          |     | (0.000)        | (0.000) | (0.092)             | (0.146) | (0.101)        | (0.122) | (0.051)             | (0.067) |
|                          | 800 | 1.000          | 1.000   | 0.996               | 0.989   | 0.040          | 0.099   | 0.008               | 0.024   |
|                          |     | (0.000)        | (0.000) | (0.020)             | (0.037) | (0.067)        | (0.100) | (0.026)             | (0.047) |
| $z_{0,ij} \sim U(-3, 3)$ |     |                |         |                     |         |                |         |                     |         |
| 50                       | 500 | 1.000          | 1.000   | 0.994               | 0.983   | 0.038          | 0.053   | 0.019               | 0.019   |
|                          |     | (0.000)        | (0.000) | (0.024)             | (0.043) | (0.065)        | (0.073) | (0.043)             | (0.043) |
|                          | 800 | 1.000          | 1.000   | 1.000               | 1.000   | 0.005          | 0.016   | 0.004               | 0.005   |
|                          |     | (0.000)        | (0.000) | (0.000)             | (0.000) | (0.024)        | (0.040) | (0.018)             | (0.020) |
| 100                      | 500 | 1.000          | 1.000   | 0.982               | 0.965   | 0.053          | 0.086   | 0.029               | 0.035   |
|                          |     | (0.000)        | (0.000) | (0.056)             | (0.066) | (0.070)        | (0.077) | (0.059)             | (0.063) |
|                          | 800 | 1.000          | 1.000   | 1.000               | 0.999   | 0.005          | 0.012   | 0.006               | 0.010   |
|                          |     | (0.000)        | (0.000) | (0.000)             | (0.010) | (0.022)        | (0.033) | (0.023)             | (0.031) |

Table S.13: The selection of latent space dimension under the low-dimensional setting with  $k = 2$  and standardized exponential random errors. The upper panel displays the means of the  $\text{Num}_k$ s along with the standard deviations in parentheses, while the lower panel displays CT.

|          |     | $B_{0,jl} \sim U(0.25, 0.5)$ |       |                          |       | $B_{0,jl} \sim U(-3, 3)$ |       |                          |       |     |
|----------|-----|------------------------------|-------|--------------------------|-------|--------------------------|-------|--------------------------|-------|-----|
|          |     | $z_{0,ij} \sim N(0, 4)$      |       | $z_{0,ij} \sim U(-3, 3)$ |       | $z_{0,ij} \sim N(0, 4)$  |       | $z_{0,ij} \sim U(-3, 3)$ |       |     |
| $p$      | $n$ | NVCM                         | TNVC  | NVCM                     | TNVC  | NVCM                     | TNVC  | NVCM                     | TNVC  |     |
| Num $_k$ |     |                              |       |                          |       |                          |       |                          |       |     |
| 5        | 300 | 2.0                          | 2.0   | 2.0                      | 2.0   | 2.0                      | 2.0   | 2.0                      | 2.0   |     |
|          |     | (0.0)                        | (0.0) | (0.0)                    | (0.0) | (0.0)                    | (0.0) | (0.0)                    | (0.0) |     |
|          | 500 | 2.0                          | 2.0   | 2.0                      | 2.0   | 2.0                      | 2.0   | 2.0                      | 2.0   |     |
|          |     | (0.0)                        | (0.0) | (0.0)                    | (0.0) | (0.0)                    | (0.0) | (0.0)                    | (0.0) |     |
|          | 800 | 2.0                          | 2.0   | 2.0                      | 2.0   | 2.0                      | 2.0   | 2.0                      | 2.0   |     |
|          |     | (0.0)                        | (0.0) | (0.0)                    | (0.0) | (0.0)                    | (0.0) | (0.0)                    | (0.0) |     |
| 10       | 300 | 2.0                          | 2.0   | 2.0                      | 2.0   | 2.0                      | 2.0   | 2.0                      | 2.0   |     |
|          |     | (0.0)                        | (0.0) | (0.0)                    | (0.0) | (0.0)                    | (0.0) | (0.0)                    | (0.0) |     |
|          | 500 | 2.0                          | 2.0   | 2.0                      | 2.0   | 2.0                      | 2.0   | 2.0                      | 2.0   |     |
|          |     | (0.0)                        | (0.0) | (0.0)                    | (0.0) | (0.0)                    | (0.0) | (0.0)                    | (0.0) |     |
|          | CT  |                              |       |                          |       |                          |       |                          |       |     |
|          | 5   | 300                          | 1.0   | 1.0                      | 1.0   | 1.0                      | 1.0   | 1.0                      | 1.0   | 1.0 |
| 500      |     | 1.0                          | 1.0   | 1.0                      | 1.0   | 1.0                      | 1.0   | 1.0                      | 1.0   |     |
| 800      |     | 1.0                          | 1.0   | 1.0                      | 1.0   | 1.0                      | 1.0   | 1.0                      | 1.0   |     |
| 10       | 300 | 1.0                          | 1.0   | 1.0                      | 1.0   | 1.0                      | 1.0   | 1.0                      | 1.0   |     |
|          | 500 | 1.0                          | 1.0   | 1.0                      | 1.0   | 1.0                      | 1.0   | 1.0                      | 1.0   |     |
|          | 800 | 1.0                          | 1.0   | 1.0                      | 1.0   | 1.0                      | 1.0   | 1.0                      | 1.0   |     |

Table S.14: The selection of latent space dimension under the high-dimensional setting with  $k = 2$  and standardized exponential random errors. The upper panel displays the means of the  $\text{Num}_k$ s along with the standard deviations in parentheses, while the lower panel displays CT.

| $n$              | $p = 50$                |       |                          |       | $p = 100$               |       |                          |       |
|------------------|-------------------------|-------|--------------------------|-------|-------------------------|-------|--------------------------|-------|
|                  | $z_{0,ij} \sim N(0, 4)$ |       | $z_{0,ij} \sim U(-3, 3)$ |       | $z_{0,ij} \sim N(0, 4)$ |       | $z_{0,ij} \sim U(-3, 3)$ |       |
|                  | SNVC                    | TSNVC | SNVC                     | TSNVC | SNVC                    | TSNVC | SNVC                     | TSNVC |
| Num <sub>k</sub> |                         |       |                          |       |                         |       |                          |       |
| 500              | 2.0                     | 2.0   | 2.0                      | 2.0   | 2.0                     | 2.0   | 2.0                      | 2.0   |
|                  | (0.0)                   | (0.0) | (0.0)                    | (0.0) | (0.0)                   | (0.0) | (0.0)                    | (0.0) |
| 800              | 2.0                     | 2.0   | 2.0                      | 2.0   | 2.0                     | 2.0   | 2.0                      | 2.0   |
|                  | (0.0)                   | (0.0) | (0.0)                    | (0.0) | (0.0)                   | (0.0) | (0.0)                    | (0.0) |
| CT               |                         |       |                          |       |                         |       |                          |       |
| 500              | 1.0                     | 1.0   | 1.0                      | 1.0   | 1.0                     | 1.0   | 1.0                      | 1.0   |
| 800              | 1.0                     | 1.0   | 1.0                      | 1.0   | 1.0                     | 1.0   | 1.0                      | 1.0   |

## S.8.2 Additional simulation studies for collinearity

In this subsection, we explore the effect of collinearity on the performance of our proposed method. To assess the effect of collinearity, we compared NVCM with the other four methods, TNVC, NLM, FMM, and CLR, used in simulation studies. The parameters and random errors are the same as those generated from the low dimensional setting in Section 4. As for generating the covariates, we consider the model  $X = Z_0 C_x + \mathcal{E}$ , where the elements of  $C_x \in \mathbb{R}^{k \times p}$  are independently generated from a standard normal distribution, and the elements of  $\mathcal{E} \in \mathbb{R}^{n \times p}$  are independently generated from  $N(0, \varrho)$  with  $\varrho = 0.25, 0.5$ , and 1. As a result, the degree of collinearity increases as  $\varrho$  decreases.

Tables S.15–S.20 present simulation results and show the following findings. As  $\varrho$  decreases, the NVCM’s performance deteriorates as expected. For example, Table S.15 indicates that  $\text{ME}_{\mathcal{T}s}$  of NVCM are 0.037, 0.064, and 0.177 when  $\varrho = 1, 0.5$ , and 0.25, respectively, under the setting  $p = 10, n = 300, z_{0,ij} \sim N(0, 4)$ , and  $B_{0,ij} \sim U(0.25, 0.5)$ . Furthermore, the robustness of NVCM against collinearity is either comparable or superior to TNVC and outperforms NLM, FMM, and CLR.

Table S.15: The means of the  $\text{ME}_{\mathcal{T}s}$  along with the standard deviations in parentheses, which are obtained under the setting that  $X = Z_0 C_x + \mathcal{E}$  with  $\varrho = 1$  and standard normal random errors.

| $p$                          | $n$ | NVCM             | TNVC             | NLM              | FMM              | CLR                       | NVCM             | TNVC             | NLM              | FMM              | CLR              |
|------------------------------|-----|------------------|------------------|------------------|------------------|---------------------------|------------------|------------------|------------------|------------------|------------------|
| $B_{0,jl} \sim U(0.25, 0.5)$ |     |                  |                  |                  |                  | $B_{0,jl} \sim U(0.5, 1)$ |                  |                  |                  |                  |                  |
| $z_{0,ij} \sim N(0, 4)$      |     |                  |                  |                  |                  |                           |                  |                  |                  |                  |                  |
| 5                            | 300 | 0.035<br>(0.004) | 0.040<br>(0.004) | 0.771<br>(0.012) | 0.766<br>(0.079) | 0.794<br>(0.009)          | 0.028<br>(0.003) | 0.043<br>(0.003) | 0.955<br>(0.009) | 0.847<br>(0.108) | 0.949<br>(0.009) |
|                              | 500 | 0.031<br>(0.002) | 0.039<br>(0.002) | 0.834<br>(0.015) | 0.727<br>(0.073) | 0.841<br>(0.012)          | 0.024<br>(0.002) | 0.041<br>(0.002) | 0.970<br>(0.011) | 0.805<br>(0.108) | 0.966<br>(0.011) |
|                              | 800 | 0.020<br>(0.001) | 0.025<br>(0.001) | 0.835<br>(0.016) | 0.559<br>(0.063) | 0.844<br>(0.009)          | 0.016<br>(0.001) | 0.027<br>(0.001) | 0.969<br>(0.008) | 0.573<br>(0.077) | 0.963<br>(0.008) |
| 10                           | 300 | 0.037<br>(0.007) | 0.077<br>(0.015) | 0.939<br>(0.081) | 1.032<br>(0.319) | 0.974<br>(0.086)          | 0.032<br>(0.005) | 0.082<br>(0.013) | 1.068<br>(0.086) | 1.287<br>(0.799) | 1.134<br>(0.092) |
|                              | 500 | 0.025<br>(0.003) | 0.054<br>(0.007) | 0.905<br>(0.046) | 0.866<br>(0.309) | 0.908<br>(0.047)          | 0.015<br>(0.002) | 0.058<br>(0.007) | 1.033<br>(0.052) | 0.954<br>(0.227) | 1.046<br>(0.055) |
|                              | 800 | 0.017<br>(0.002) | 0.032<br>(0.003) | 0.885<br>(0.033) | 0.557<br>(0.182) | 0.882<br>(0.034)          | 0.011<br>(0.001) | 0.034<br>(0.003) | 1.020<br>(0.041) | 0.609<br>(0.062) | 1.019<br>(0.042) |
| $z_{0,ij} \sim U(-3, 3)$     |     |                  |                  |                  |                  |                           |                  |                  |                  |                  |                  |
| 5                            | 300 | 0.020<br>(0.004) | 0.021<br>(0.004) | 0.751<br>(0.013) | 0.726<br>(0.091) | 0.774<br>(0.012)          | 0.016<br>(0.002) | 0.019<br>(0.002) | 0.945<br>(0.009) | 0.768<br>(0.122) | 0.940<br>(0.010) |
|                              | 500 | 0.014<br>(0.002) | 0.015<br>(0.002) | 0.743<br>(0.007) | 0.658<br>(0.084) | 0.763<br>(0.007)          | 0.011<br>(0.001) | 0.014<br>(0.001) | 0.922<br>(0.016) | 0.719<br>(0.093) | 0.934<br>(0.008) |
|                              | 800 | 0.009<br>(0.001) | 0.010<br>(0.001) | 0.775<br>(0.006) | 0.666<br>(0.045) | 0.794<br>(0.006)          | 0.008<br>(0.001) | 0.010<br>(0.001) | 0.935<br>(0.013) | 0.675<br>(0.058) | 0.944<br>(0.006) |
| 10                           | 300 | 0.026<br>(0.006) | 0.028<br>(0.005) | 0.809<br>(0.041) | 0.617<br>(0.141) | 0.824<br>(0.043)          | 0.018<br>(0.003) | 0.027<br>(0.004) | 1.000<br>(0.046) | 0.735<br>(0.139) | 1.020<br>(0.047) |
|                              | 500 | 0.014<br>(0.002) | 0.018<br>(0.002) | 0.800<br>(0.033) | 0.623<br>(0.057) | 0.826<br>(0.029)          | 0.010<br>(0.001) | 0.017<br>(0.002) | 0.982<br>(0.031) | 0.703<br>(0.074) | 0.990<br>(0.029) |
|                              | 800 | 0.010<br>(0.001) | 0.012<br>(0.001) | 0.768<br>(0.015) | 0.639<br>(0.061) | 0.806<br>(0.015)          | 0.007<br>(0.001) | 0.012<br>(0.001) | 0.963<br>(0.025) | 0.741<br>(0.075) | 0.975<br>(0.022) |

Table S.16: The means of the  $ME_{\mathcal{T}}$ s along with the standard deviations in parentheses, which are obtained under the setting that  $X = Z_0 C_x + \mathcal{E}$  with  $\varrho = 0.5$  and standard normal random errors.

| $p$                          | $n$ | NVCM    | TNVC    | NLM     | FMM     | CLR                       | NVCM    | TNVC    | NLM     | FMM     | CLR     |
|------------------------------|-----|---------|---------|---------|---------|---------------------------|---------|---------|---------|---------|---------|
| $B_{0,jl} \sim U(0.25, 0.5)$ |     |         |         |         |         | $B_{0,jl} \sim U(0.5, 1)$ |         |         |         |         |         |
| $z_{0,ij} \sim N(0, 4)$      |     |         |         |         |         |                           |         |         |         |         |         |
| 5                            | 300 | 0.043   | 0.047   | 0.783   | 0.844   | 0.797                     | 0.035   | 0.046   | 0.951   | 0.912   | 0.952   |
|                              |     | (0.007) | (0.007) | (0.012) | (0.079) | (0.012)                   | (0.004) | (0.004) | (0.011) | (0.098) | (0.011) |
|                              | 500 | 0.036   | 0.043   | 0.837   | 0.772   | 0.849                     | 0.028   | 0.043   | 0.975   | 0.807   | 0.975   |
|                              |     | (0.004) | (0.004) | (0.021) | (0.074) | (0.018)                   | (0.003) | (0.003) | (0.018) | (0.103) | (0.017) |
|                              | 800 | 0.022   | 0.027   | 0.838   | 0.567   | 0.850                     | 0.017   | 0.028   | 0.971   | 0.573   | 0.969   |
|                              |     | (0.002) | (0.002) | (0.017) | (0.056) | (0.014)                   | (0.001) | (0.002) | (0.012) | (0.063) | (0.014) |
| 10                           | 300 | 0.064   | 0.114   | 1.067   | 1.455   | 1.114                     | 0.048   | 0.117   | 1.223   | 1.669   | 1.290   |
|                              |     | (0.019) | (0.028) | (0.151) | (0.835) | (0.157)                   | (0.013) | (0.024) | (0.162) | (1.025) | (0.168) |
|                              | 500 | 0.034   | 0.070   | 0.976   | 0.963   | 0.981                     | 0.019   | 0.073   | 1.110   | 1.061   | 1.127   |
|                              |     | (0.006) | (0.012) | (0.084) | (0.212) | (0.087)                   | (0.003) | (0.012) | (0.093) | (0.156) | (0.099) |
|                              | 800 | 0.022   | 0.040   | 0.936   | 0.593   | 0.938                     | 0.014   | 0.041   | 1.076   | 0.678   | 1.080   |
|                              |     | (0.004) | (0.006) | (0.058) | (0.073) | (0.063)                   | (0.002) | (0.006) | (0.070) | (0.070) | (0.077) |
| $z_{0,ij} \sim U(-3, 3)$     |     |         |         |         |         |                           |         |         |         |         |         |
| 5                            | 300 | 0.028   | 0.028   | 0.764   | 0.801   | 0.777                     | 0.019   | 0.022   | 0.936   | 0.842   | 0.942   |
|                              |     | (0.007) | (0.007) | (0.014) | (0.084) | (0.014)                   | (0.002) | (0.003) | (0.012) | (0.091) | (0.011) |
|                              | 500 | 0.019   | 0.019   | 0.754   | 0.758   | 0.765                     | 0.014   | 0.016   | 0.923   | 0.778   | 0.936   |
|                              |     | (0.004) | (0.004) | (0.009) | (0.058) | (0.009)                   | (0.001) | (0.001) | (0.011) | (0.083) | (0.010) |
|                              | 800 | 0.012   | 0.012   | 0.784   | 0.692   | 0.796                     | 0.009   | 0.011   | 0.934   | 0.713   | 0.946   |
|                              |     | (0.002) | (0.002) | (0.008) | (0.040) | (0.008)                   | (0.001) | (0.001) | (0.009) | (0.047) | (0.008) |
| 10                           | 300 | 0.045   | 0.043   | 0.858   | 0.661   | 0.891                     | 0.028   | 0.036   | 1.066   | 0.736   | 1.099   |
|                              |     | (0.014) | (0.009) | (0.075) | (0.141) | (0.079)                   | (0.007) | (0.007) | (0.082) | (0.103) | (0.085) |
|                              | 500 | 0.021   | 0.025   | 0.823   | 0.637   | 0.863                     | 0.013   | 0.021   | 0.991   | 0.726   | 1.033   |
|                              |     | (0.005) | (0.004) | (0.049) | (0.048) | (0.049)                   | (0.002) | (0.003) | (0.047) | (0.060) | (0.049) |
|                              | 800 | 0.014   | 0.016   | 0.798   | 0.715   | 0.832                     | 0.008   | 0.014   | 0.971   | 0.821   | 1.008   |
|                              |     | (0.002) | (0.002) | (0.027) | (0.051) | (0.027)                   | (0.001) | (0.001) | (0.037) | (0.056) | (0.039) |



Table S.17: The means of the  $ME_{\mathcal{T}}$ s along with the standard deviations in parentheses, which are obtained under the setting that  $X = Z_0 C_x + \mathcal{E}$  with  $\varrho = 0.25$  and standard normal random errors.

| $p$                          | $n$ | NVCM    | TNVC    | NLM     | FMM     | CLR                       | NVCM    | TNVC    | NLM     | FMM     | CLR     |
|------------------------------|-----|---------|---------|---------|---------|---------------------------|---------|---------|---------|---------|---------|
| $B_{0,jl} \sim U(0.25, 0.5)$ |     |         |         |         |         | $B_{0,jl} \sim U(0.5, 1)$ |         |         |         |         |         |
| $z_{0,ij} \sim N(0, 4)$      |     |         |         |         |         |                           |         |         |         |         |         |
| 5                            | 300 | 0.059   | 0.059   | 0.795   | 0.873   | 0.804                     | 0.044   | 0.052   | 0.953   | 0.948   | 0.958   |
|                              |     | (0.015) | (0.012) | (0.017) | (0.094) | (0.017)                   | (0.007) | (0.006) | (0.016) | (0.076) | (0.016) |
|                              | 500 | 0.045   | 0.050   | 0.852   | 0.804   | 0.866                     | 0.033   | 0.047   | 0.985   | 0.811   | 0.992   |
|                              |     | (0.008) | (0.008) | (0.031) | (0.074) | (0.031)                   | (0.004) | (0.004) | (0.030) | (0.107) | (0.031) |
| 10                           | 800 | 0.027   | 0.032   | 0.851   | 0.569   | 0.863                     | 0.019   | 0.030   | 0.978   | 0.582   | 0.981   |
|                              |     | (0.004) | (0.004) | (0.026) | (0.052) | (0.025)                   | (0.002) | (0.003) | (0.022) | (0.063) | (0.024) |
|                              | 300 | 0.177   | 0.189   | 1.339   | 2.273   | 1.394                     | 0.103   | 0.188   | 1.530   | 2.427   | 1.600   |
|                              |     | (0.112) | (0.052) | (0.292) | (1.762) | (0.297)                   | (0.040) | (0.047) | (0.314) | (1.513) | (0.318) |
| 10                           | 500 | 0.054   | 0.104   | 1.116   | 1.317   | 1.128                     | 0.031   | 0.103   | 1.265   | 1.446   | 1.290   |
|                              |     | (0.014) | (0.023) | (0.160) | (0.396) | (0.167)                   | (0.013) | (0.023) | (0.178) | (0.583) | (0.186) |
|                              | 800 | 0.034   | 0.057   | 1.035   | 0.718   | 1.051                     | 0.022   | 0.056   | 1.185   | 0.787   | 1.203   |
|                              |     | (0.008) | (0.011) | (0.115) | (0.123) | (0.122)                   | (0.005) | (0.012) | (0.135) | (0.119) | (0.146) |
| $z_{0,ij} \sim U(-3, 3)$     |     |         |         |         |         |                           |         |         |         |         |         |
| 5                            | 300 | 0.042   | 0.041   | 0.776   | 0.884   | 0.783                     | 0.025   | 0.026   | 0.938   | 0.940   | 0.945   |
|                              |     | (0.014) | (0.014) | (0.018) | (0.120) | (0.018)                   | (0.004) | (0.005) | (0.014) | (0.090) | (0.014) |
|                              | 500 | 0.028   | 0.027   | 0.763   | 0.850   | 0.770                     | 0.017   | 0.018   | 0.930   | 0.855   | 0.939   |
|                              |     | (0.008) | (0.008) | (0.013) | (0.071) | (0.013)                   | (0.002) | (0.002) | (0.014) | (0.082) | (0.014) |
| 10                           | 800 | 0.016   | 0.016   | 0.792   | 0.667   | 0.801                     | 0.011   | 0.013   | 0.940   | 0.715   | 0.951   |
|                              |     | (0.004) | (0.004) | (0.012) | (0.042) | (0.012)                   | (0.001) | (0.002) | (0.012) | (0.046) | (0.012) |
|                              | 300 | 0.177   | 0.071   | 0.984   | 0.737   | 1.024                     | 0.058   | 0.055   | 1.211   | 0.829   | 1.257   |
|                              |     | (0.196) | (0.017) | (0.147) | (0.196) | (0.150)                   | (0.021) | (0.012) | (0.157) | (0.177) | (0.161) |
| 10                           | 500 | 0.036   | 0.039   | 0.897   | 0.673   | 0.938                     | 0.022   | 0.029   | 1.068   | 0.781   | 1.118   |
|                              |     | (0.010) | (0.008) | (0.088) | (0.062) | (0.088)                   | (0.005) | (0.005) | (0.088) | (0.069) | (0.089) |
|                              | 800 | 0.021   | 0.024   | 0.853   | 0.784   | 0.885                     | 0.012   | 0.018   | 1.034   | 0.923   | 1.073   |
|                              |     | (0.005) | (0.004) | (0.051) | (0.069) | (0.050)                   | (0.002) | (0.003) | (0.070) | (0.094) | (0.072) |

Table S.18: The means of the  $\text{ME}_\gamma$ s and the  $\text{ME}_B$ s along with the standard deviations in parentheses, which are obtained under the setting that  $X = Z_0 C_x + \mathcal{E}$  with  $\varrho = 1$  and standard normal random errors.

| $p$                      | $n$ | NVCM                         | TNVC    | NVCM          | TNVC    | NVCM                      | TNVC    | NVCM          | TNVC    |
|--------------------------|-----|------------------------------|---------|---------------|---------|---------------------------|---------|---------------|---------|
|                          |     | $\text{ME}_\gamma$           |         | $\text{ME}_B$ |         | $\text{ME}_\gamma$        |         | $\text{ME}_B$ |         |
|                          |     | $B_{0,jl} \sim U(0.25, 0.5)$ |         |               |         | $B_{0,jl} \sim U(0.5, 1)$ |         |               |         |
| $z_{0,ij} \sim N(0, 4)$  |     |                              |         |               |         |                           |         |               |         |
| 5                        | 300 | 0.011                        | 0.012   | 0.029         | 0.027   | 0.014                     | 0.017   | 0.022         | 0.024   |
|                          |     | (0.008)                      | (0.008) | (0.011)       | (0.011) | (0.013)                   | (0.013) | (0.007)       | (0.011) |
|                          | 500 | 0.007                        | 0.009   | 0.027         | 0.032   | 0.009                     | 0.015   | 0.017         | 0.029   |
|                          |     | (0.005)                      | (0.006) | (0.008)       | (0.011) | (0.007)                   | (0.012) | (0.005)       | (0.009) |
|                          | 800 | 0.004                        | 0.005   | 0.020         | 0.023   | 0.005                     | 0.010   | 0.014         | 0.022   |
|                          |     | (0.003)                      | (0.004) | (0.006)       | (0.007) | (0.004)                   | (0.009) | (0.002)       | (0.005) |
| 10                       | 300 | 0.022                        | 0.049   | 0.041         | 0.071   | 0.039                     | 0.142   | 0.053         | 0.064   |
|                          |     | (0.011)                      | (0.024) | (0.015)       | (0.027) | (0.019)                   | (0.072) | (0.015)       | (0.022) |
|                          | 500 | 0.012                        | 0.026   | 0.027         | 0.054   | 0.015                     | 0.072   | 0.017         | 0.048   |
|                          |     | (0.006)                      | (0.013) | (0.007)       | (0.018) | (0.007)                   | (0.034) | (0.005)       | (0.018) |
|                          | 800 | 0.007                        | 0.013   | 0.019         | 0.032   | 0.008                     | 0.031   | 0.013         | 0.029   |
|                          |     | (0.003)                      | (0.006) | (0.005)       | (0.010) | (0.004)                   | (0.016) | (0.002)       | (0.008) |
| $z_{0,ij} \sim U(-3, 3)$ |     |                              |         |               |         |                           |         |               |         |
| 5                        | 300 | 0.009                        | 0.009   | 0.010         | 0.008   | 0.010                     | 0.011   | 0.005         | 0.004   |
|                          |     | (0.006)                      | (0.006) | (0.006)       | (0.005) | (0.008)                   | (0.008) | (0.003)       | (0.002) |
|                          | 500 | 0.006                        | 0.006   | 0.011         | 0.010   | 0.006                     | 0.006   | 0.006         | 0.006   |
|                          |     | (0.004)                      | (0.005) | (0.005)       | (0.005) | (0.004)                   | (0.004) | (0.002)       | (0.002) |
|                          | 800 | 0.003                        | 0.003   | 0.007         | 0.007   | 0.004                     | 0.005   | 0.005         | 0.005   |
|                          |     | (0.003)                      | (0.003) | (0.003)       | (0.003) | (0.003)                   | (0.004) | (0.001)       | (0.002) |
| 10                       | 300 | 0.018                        | 0.019   | 0.019         | 0.016   | 0.024                     | 0.031   | 0.019         | 0.011   |
|                          |     | (0.010)                      | (0.010) | (0.007)       | (0.006) | (0.010)                   | (0.016) | (0.008)       | (0.004) |
|                          | 500 | 0.009                        | 0.010   | 0.011         | 0.012   | 0.012                     | 0.017   | 0.007         | 0.009   |
|                          |     | (0.005)                      | (0.005) | (0.004)       | (0.004) | (0.005)                   | (0.009) | (0.003)       | (0.003) |
|                          | 800 | 0.005                        | 0.006   | 0.008         | 0.008   | 0.007                     | 0.009   | 0.004         | 0.006   |
|                          |     | (0.003)                      | (0.003) | (0.002)       | (0.002) | (0.003)                   | (0.004) | (0.001)       | (0.002) |

Table S.19: The means of the  $ME_\gamma$ s and the  $ME_B$ s along with the standard deviations in parentheses, which are obtained under the setting that  $X = Z_0 C_x + \mathcal{E}$  with  $\varrho = 0.5$  and standard normal random errors.

| $p$                      | $n$ | NVCM                         | TNVC    | NVCM    | TNVC    | NVCM                      | TNVC    | NVCM    | TNVC    |
|--------------------------|-----|------------------------------|---------|---------|---------|---------------------------|---------|---------|---------|
|                          |     | $ME_\gamma$                  |         | $ME_B$  |         | $ME_\gamma$               |         | $ME_B$  |         |
|                          |     | $B_{0,jl} \sim U(0.25, 0.5)$ |         |         |         | $B_{0,jl} \sim U(0.5, 1)$ |         |         |         |
| $z_{0,ij} \sim N(0, 4)$  |     |                              |         |         |         |                           |         |         |         |
| 5                        | 300 | 0.020                        | 0.021   | 0.037   | 0.033   | 0.024                     | 0.027   | 0.026   | 0.027   |
|                          |     | (0.015)                      | (0.015) | (0.015) | (0.014) | (0.022)                   | (0.021) | (0.010) | (0.013) |
|                          | 500 | 0.014                        | 0.015   | 0.032   | 0.037   | 0.016                     | 0.025   | 0.019   | 0.031   |
|                          |     | (0.010)                      | (0.011) | (0.011) | (0.014) | (0.013)                   | (0.020) | (0.006) | (0.010) |
|                          | 800 | 0.008                        | 0.009   | 0.022   | 0.025   | 0.010                     | 0.016   | 0.015   | 0.023   |
|                          |     | (0.006)                      | (0.006) | (0.008) | (0.009) | (0.009)                   | (0.015) | (0.003) | (0.007) |
| 10                       | 300 | 0.044                        | 0.091   | 0.079   | 0.115   | 0.071                     | 0.257   | 0.076   | 0.100   |
|                          |     | (0.023)                      | (0.045) | (0.037) | (0.043) | (0.035)                   | (0.126) | (0.029) | (0.035) |
|                          | 500 | 0.023                        | 0.048   | 0.038   | 0.074   | 0.029                     | 0.129   | 0.022   | 0.065   |
|                          |     | (0.012)                      | (0.025) | (0.011) | (0.026) | (0.014)                   | (0.060) | (0.007) | (0.026) |
|                          | 800 | 0.014                        | 0.024   | 0.026   | 0.042   | 0.016                     | 0.058   | 0.017   | 0.036   |
|                          |     | (0.007)                      | (0.012) | (0.008) | (0.014) | (0.008)                   | (0.030) | (0.003) | (0.011) |
| $z_{0,ij} \sim U(-3, 3)$ |     |                              |         |         |         |                           |         |         |         |
| 5                        | 300 | 0.017                        | 0.017   | 0.017   | 0.014   | 0.018                     | 0.019   | 0.007   | 0.005   |
|                          |     | (0.013)                      | (0.012) | (0.009) | (0.008) | (0.014)                   | (0.015) | (0.004) | (0.003) |
|                          | 500 | 0.011                        | 0.011   | 0.015   | 0.014   | 0.011                     | 0.011   | 0.008   | 0.007   |
|                          |     | (0.008)                      | (0.008) | (0.008) | (0.007) | (0.007)                   | (0.007) | (0.003) | (0.003) |
|                          | 800 | 0.006                        | 0.006   | 0.009   | 0.009   | 0.008                     | 0.009   | 0.006   | 0.006   |
|                          |     | (0.005)                      | (0.005) | (0.005) | (0.005) | (0.007)                   | (0.007) | (0.002) | (0.002) |
| 10                       | 300 | 0.036                        | 0.036   | 0.038   | 0.029   | 0.048                     | 0.055   | 0.027   | 0.018   |
|                          |     | (0.020)                      | (0.019) | (0.018) | (0.010) | (0.020)                   | (0.028) | (0.013) | (0.007) |
|                          | 500 | 0.018                        | 0.019   | 0.018   | 0.019   | 0.023                     | 0.030   | 0.010   | 0.012   |
|                          |     | (0.009)                      | (0.009) | (0.007) | (0.006) | (0.011)                   | (0.016) | (0.004) | (0.004) |
|                          | 800 | 0.010                        | 0.011   | 0.011   | 0.012   | 0.014                     | 0.017   | 0.006   | 0.008   |
|                          |     | (0.005)                      | (0.005) | (0.003) | (0.003) | (0.007)                   | (0.007) | (0.002) | (0.003) |

Table S.20: The means of the  $ME_\gamma$ s and the  $ME_B$ s along with the standard deviations in parentheses, which are obtained under the setting that  $X = Z_0 C_x + \mathcal{E}$  with  $\varrho = 0.25$  and standard normal random errors.

| $p$                      | $n$ | NVCM                         | TNVC    | NVCM    | TNVC    | NVCM                      | TNVC    | NVCM    | TNVC    |
|--------------------------|-----|------------------------------|---------|---------|---------|---------------------------|---------|---------|---------|
|                          |     | $ME_\gamma$                  |         | $ME_B$  |         | $ME_\gamma$               |         | $ME_B$  |         |
|                          |     | $B_{0,jl} \sim U(0.25, 0.5)$ |         |         |         | $B_{0,jl} \sim U(0.5, 1)$ |         |         |         |
| $z_{0,ij} \sim N(0, 4)$  |     |                              |         |         |         |                           |         |         |         |
| 5                        | 300 | 0.039                        | 0.039   | 0.054   | 0.046   | 0.045                     | 0.047   | 0.033   | 0.033   |
|                          |     | (0.028)                      | (0.028) | (0.025) | (0.021) | (0.041)                   | (0.039) | (0.017) | (0.016) |
|                          | 500 | 0.026                        | 0.028   | 0.041   | 0.045   | 0.030                     | 0.043   | 0.023   | 0.035   |
|                          |     | (0.018)                      | (0.020) | (0.017) | (0.019) | (0.024)                   | (0.037) | (0.008) | (0.013) |
|                          | 800 | 0.015                        | 0.017   | 0.027   | 0.030   | 0.019                     | 0.029   | 0.017   | 0.026   |
|                          |     | (0.011)                      | (0.012) | (0.011) | (0.013) | (0.017)                   | (0.027) | (0.004) | (0.008) |
| 10                       | 300 | 0.101                        | 0.173   | 0.259   | 0.202   | 0.154                     | 0.486   | 0.162   | 0.173   |
|                          |     | (0.057)                      | (0.086) | (0.206) | (0.076) | (0.074)                   | (0.234) | (0.069) | (0.062) |
|                          | 500 | 0.047                        | 0.092   | 0.063   | 0.114   | 0.059                     | 0.244   | 0.036   | 0.098   |
|                          |     | (0.024)                      | (0.048) | (0.022) | (0.042) | (0.028)                   | (0.113) | (0.023) | (0.042) |
|                          | 800 | 0.028                        | 0.046   | 0.042   | 0.060   | 0.031                     | 0.114   | 0.029   | 0.051   |
|                          |     | (0.013)                      | (0.023) | (0.015) | (0.021) | (0.016)                   | (0.059) | (0.007) | (0.018) |
| $z_{0,ij} \sim U(-3, 3)$ |     |                              |         |         |         |                           |         |         |         |
| 5                        | 300 | 0.032                        | 0.032   | 0.030   | 0.026   | 0.035                     | 0.035   | 0.010   | 0.008   |
|                          |     | (0.026)                      | (0.025) | (0.018) | (0.016) | (0.027)                   | (0.027) | (0.006) | (0.005) |
|                          | 500 | 0.020                        | 0.020   | 0.024   | 0.021   | 0.020                     | 0.020   | 0.010   | 0.009   |
|                          |     | (0.016)                      | (0.016) | (0.013) | (0.011) | (0.012)                   | (0.013) | (0.004) | (0.004) |
|                          | 800 | 0.012                        | 0.012   | 0.014   | 0.013   | 0.016                     | 0.016   | 0.007   | 0.007   |
|                          |     | (0.010)                      | (0.010) | (0.007) | (0.007) | (0.013)                   | (0.013) | (0.003) | (0.003) |
| 10                       | 300 | 0.090                        | 0.069   | 0.200   | 0.055   | 0.109                     | 0.102   | 0.060   | 0.034   |
|                          |     | (0.066)                      | (0.036) | (0.253) | (0.019) | (0.051)                   | (0.051) | (0.029) | (0.013) |
|                          | 500 | 0.035                        | 0.037   | 0.033   | 0.033   | 0.047                     | 0.057   | 0.018   | 0.019   |
|                          |     | (0.018)                      | (0.018) | (0.014) | (0.011) | (0.022)                   | (0.030) | (0.007) | (0.007) |
|                          | 800 | 0.020                        | 0.021   | 0.020   | 0.020   | 0.027                     | 0.032   | 0.009   | 0.011   |
|                          |     | (0.010)                      | (0.010) | (0.006) | (0.006) | (0.013)                   | (0.014) | (0.003) | (0.004) |

## S.9 Additional Data Description and Results of Data Analysis

### S.9.1 Ten financial ratios

The detailed description of the 10 financial ratios is provided in Table S.21.

Table S.21: Definitions of the 10 financial ratios.

| Covariates | Description                       |
|------------|-----------------------------------|
| $X_1$      | book to market ratio              |
| $X_2$      | earnings per share/stock price    |
| $X_3$      | firm equity/interest-bearing debt |
| $X_4$      | fixed assets ratio                |
| $X_5$      | total operating revenue           |
| $X_6$      | net debt                          |
| $X_7$      | interest-free liabilities         |
| $X_8$      | operating cash flow/net debt      |
| $X_9$      | price-to-book ratio               |
| $X_{10}$   | working capital                   |

### S.9.2 Stock groups

To better understand the varying relationships between stock returns and ten financial ratios, the stocks are grouped based on their correspondingly estimated coefficients  $\hat{\beta}_i$  classified by  $K$ -means. The number of groups is determined by the elbow method, which yields three groups. In sum, the number of stocks in each group is 283, 134, and 383, respectively. For each individual group, Figure S.1 depicts the boxplots of the coefficients for the intercept and ten financial ratios. Moreover, Figure S.1 supports the findings of Figure 2. That is identifying the distributional difference in regression coefficients among the three groups, especially for the intercept and  $X_8$ .

### S.9.3 Estimation stability

We employ the approach of Li et al. (2020) to evaluate the stability of the estimates of  $B$ . We generate adjacency matrices  $\tilde{A}$  with 90% edges being randomly selected from those of the true adjacency matrix  $A$ . Given  $\tilde{A}$ , we fit models (1) and (2) to estimate  $B$ . This procedure was repeated 50 times, and Figure S.2 depicts the estimates of  $B$ . The results indicate that the estimation of  $B$  is robust to small changes in the network structure.

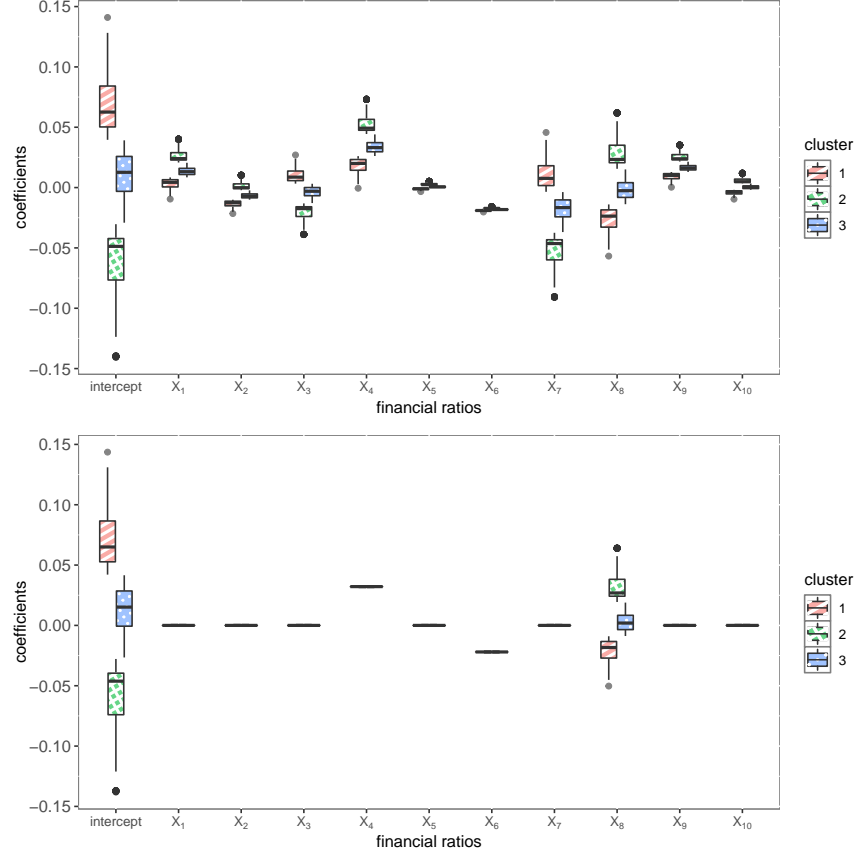

Figure S.1: Boxplots of the estimated regression coefficients for the intercept and 10 financial ratios in three groups separately, which are obtained by fitting all the stocks via NVCM and SNVC. The upper and lower panels depict plots for NVCM and SNVC, respectively. For each covariate, the three boxplots from left to right correspond to the first to the third groups.

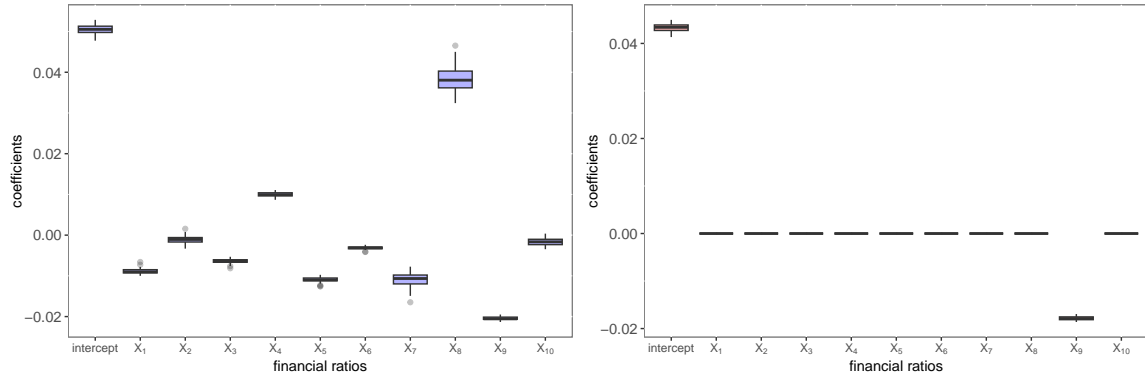

Figure S.2: Boxplots of the estimators of  $B$  for the intercept and 10 financial ratios. The left and right panels correspond to the estimates obtained using NVCM and SNVC, respectively.

# References

- Binkiewicz, N., Vogelstein, J. T. and Rohe, K. (2017). “Covariate-assisted spectral clustering,” *Biometrika*, 104, 361-377.
- Hallac, D., Leskovec, J. and Boyd, S. (2015). “Network lasso: clustering and optimization in large graphs,” *In Proceedings of the 21th ACM SIGKDD International Conference on Knowledge Discovery and Data Mining*, 387-396.
- Leisch, F. (2004). “Flexmix: A general framework for finite mixture models and latent glass regression in R,” *Journal of Statistical Software*, 11, 1-18.
- Li, C. and Li, H. (2008). “Network-constrained regularization and variable selection for analysis of genomic data,” *Bioinformatics*, 24, 1175-1182.
- Li, T., Levina, E. and Zhu, J. (2020). “Network cross-validation by edge sampling,” *Biometrika*, 107, 257-276.
- Ma, Z., Ma, Z. and Yuan, H. (2020). “Universal latent space model fitting for large networks with edge covariates,” *Journal of Machine Learning Research*, 21, 1-67.
- Rubin-Delanchy, P., Cape, J., Tang, M. and Priebe, C. E. (2022). “A statistical interpretation of spectral embedding: the generalised random dot product graph,” *Journal of the Royal Statistical Society Series B: Statistical Methodology*, 84, 1446-1473.
- Rudelson, M. and Vershynin, R. (2013). “Hanson-wright inequality and sub-gaussian concentration,” *Electronic Communications in Probability*, 18, 1-9.
